# Supplementary material for: Food consumption and the actual statistics of cardiovascular diseases: an epidemiological comparison of 42 European countries
Source: PubMed Central journal article supplement (PMC5040825; doi:10.3402/fnr.v60.31694), 2016-09-27
Supplement: FNR-60-31694-s002.pdf [file FNR-60-31694-s002.pdf]

## Supplementary tables and figures

Supplementary Table 1. Composition of fat in various food items. (Fatty acids in %)

|                                | Saturated fatty acids |        |          |          |         | MUFA (monounsatur.) |                    |                     | PUFA (polyunsaturated) |                    |                    |       |      |       |
|--------------------------------|-----------------------|--------|----------|----------|---------|---------------------|--------------------|---------------------|------------------------|--------------------|--------------------|-------|------|-------|
|                                | 12:0                  |        | 14:0     | 16:0     | 18:0    | 18:1                |                    | 18:1t               | 18:2                   |                    | 18:3               | 20:4  | 20:5 | 22:6  |
|                                | Total                 | Lauric | Myristic | Palmitic | Stearic | Total               | (Oleic)*           | Elaidic or Vaccenic | Total                  | (Linoleic)*        | (ALA)†             | ARA** | EPA  | DHA   |
| <b>DAIRY &amp; EGGS</b>        |                       |        |          |          |         |                     |                    |                     |                        |                    |                    |       |      |       |
| Butter, w/o salt               | 62,25                 | 3,19   | 9,17     | 26,75    | 12,33   | 28,89               | 20,93              | 3,68                | 3,71                   | 2,67               | 0,39               | 0,00  | 0,00 | 0,00  |
| Cheese, Mozzarella (22,4% fat) | 58,84                 | 3,09   | 9,79     | 23,85    | 10,93   | 29,41               | 25,27 <sup>1</sup> |                     | 3,42                   | 1,76 <sup>2</sup>  | 1,66 <sup>3</sup>  | 0,00  | 0,00 | 0,00  |
| Cheese, cheddar (20,4% fat)    | 61,75                 | 3,14   | 10,05    | 28,22    | 10,58   | 25,99               | 20,46              | 2,52                | 4,38                   | 2,43               | 0,30               | 0,17  | 0,03 | 0,00  |
| Goat milk (4,1% fat)           | 64,42                 | 3,00   | 7,85     | 22,01    | 10,65   | 26,79               | 23,60 <sup>1</sup> |                     | 3,60                   | 2,63 <sup>2</sup>  | 0,97 <sup>3</sup>  | 0,00  | 0,00 | 0,00  |
| Low -fat milk (1,0% fat)       | 65,26                 | 2,99   | 9,38     | 29,59    | 12,99   | 28,56               | 21,96              | 3,81                | 3,61                   | 2,78               | 0,41               | 0,00  | 0,00 | 0,00  |
| Whole milk (3,3% fat)          | 57,03                 | 2,35   | 9,08     | 25,35    | 11,16   | 24,83               | 24,83 <sup>1</sup> |                     | 5,96                   | 3,67 <sup>2</sup>  | 2,29 <sup>3</sup>  | 0,00  | 0,00 | 0,00  |
| Eggs, hard-boiled              | 30,79                 | 0,03   | 0,33     | 22,14    | 7,80    | 38,43               | 35,11 <sup>1</sup> |                     | 13,33                  | 11,20 <sup>2</sup> | 0,33 <sup>3</sup>  | 1,40  | 0,05 | 0,36  |
| <b>MEAT</b>                    |                       |        |          |          |         |                     |                    |                     |                        |                    |                    |       |      |       |
| Beef brisket, cooked           | 37,53                 | 0,07   | 3,26     | 23,11    | 10,94   | 46,81               | 42,03 <sup>1</sup> |                     | 2,61                   | 2,17 <sup>2</sup>  | 0,22 <sup>3</sup>  | 0,22  |      |       |
| Chicken breast, cooked         | 31,29                 | 0,16   | 0,60     | 22,21    | 7,44    | 38,23               | 32,52              | 0,28                | 24,10                  | 18,27              | 0,76               | 2,68  | 0,13 | 0,22  |
| Lard                           | 39,20                 | 0,20   | 1,30     | 23,80    | 13,50   | 45,10               | 41,20 <sup>1</sup> |                     | 11,20                  | 10,20 <sup>2</sup> | 1,00 <sup>3</sup>  | 0,00  | 0,00 | 0,00  |
| Mutton tallow                  | 47,30                 | 0,00   | 3,80     | 21,50    | 19,50   | 40,60               | 37,60 <sup>1</sup> |                     | 7,80 <sup>2</sup>      | 5,50 <sup>3</sup>  | 2,30 <sup>4</sup>  | 0,00  | 0,00 | 0,00  |
| Pork bacon, baked              | 32,79                 | 0,00   | 1,27     | 20,86    | 10,19   | 44,06               | 40,30 <sup>1</sup> |                     | 11,23                  | 9,45               | 0,49               | 0,35  | 0,00 | 0,00  |
| <b>FISH</b>                    |                       |        |          |          |         |                     |                    |                     |                        |                    |                    |       |      |       |
| Carp, raw                      | 19,34                 | 0,00   | 2,04     | 11,73    | 3,30    | 41,57               | 20,54 <sup>1</sup> |                     | 25,55                  | 9,23 <sup>2</sup>  | 4,82 <sup>3</sup>  | 2,71  | 4,25 | 2,04  |
| Herring (Atlantic), raw        | 22,57                 | 0,13   | 6,13     | 14,97    | 1,21    | 41,33               | 16,77 <sup>1</sup> |                     | 23,60                  | 1,44 <sup>2</sup>  | 1,14 <sup>3</sup>  | 0,66  | 7,84 | 9,54  |
| Salmon (Atlantic), farmed, raw | 22,73                 | 0,00   | 4,14     | 13,99    | 3,69    | 28,09               | 20,23 <sup>1</sup> |                     | 28,96                  | 6,71 <sup>2</sup>  | 1,10               | 0,69  | 6,42 | 8,23  |
| Sardine (Atlantic) & plant oil | 13,35                 | 0,00   | 1,68     | 8,67     | 3,00    | 33,79               | 18,73 <sup>1</sup> |                     | 44,96                  | 30,94 <sup>2</sup> | 4,35 <sup>3</sup>  | 0,00  | 4,13 | 4,45  |
| Sardine (Pacific)&tomato sauce | 25,34                 | 0,00   | 6,72     | 16,63    | 2,33    | 46,10               | 17,70 <sup>1</sup> |                     | 20,20                  | 1,18 <sup>2</sup>  | 2,25 <sup>3</sup>  | 2,84  | 5,09 | 8,27  |
| Mackerel (Atlantic), cooked    | 23,45                 | 0,12   | 4,85     | 15,30    | 3,05    | 39,28               | 16,44              |                     | 24,12                  | 1,58 <sup>2</sup>  | 1,14 <sup>3</sup>  | 1,32  | 6,46 | 10,09 |
| Tuna, yellow fin, raw          | 35,10                 | 0,20   | 1,84     | 21,63    | 9,18    | 23,67               | 16,33              | 0,61                | 30,00                  | 1,22               | 0,41               | 3,06  | 2,45 | 17,96 |
| <b>PLANT SEEDS &amp; OILS</b>  |                       |        |          |          |         |                     |                    |                     |                        |                    |                    |       |      |       |
| Almonds                        | 7,62                  | 0,00   | 0,01     | 6,18     | 1,41    | 63,20               | 62,68              | 0,00                | 24,69                  | 24,68              | 0,01               | 0,00  | 0,00 | 0,00  |
| Cocoa butter oil               | 59,70                 | 0,00   | 0,10     | 25,40    | 33,20   | 32,90               | 32,60 <sup>1</sup> |                     | 3,00                   | 2,80 <sup>2</sup>  | 0,10 <sup>3</sup>  | 0,00  | 0,00 | 0,00  |
| Coconut oil                    | 86,50                 | 44,60  | 16,80    | 8,20     | 2,80    | 5,80                | 5,80 <sup>1</sup>  |                     | 1,80                   | 1,80 <sup>2</sup>  | 0,00               | 0,00  | 0,00 | 0,00  |
| Corn oil, all-purpose          | 12,95                 | 0,00   | 0,02     | 10,58    | 1,85    | 27,58               | 27,33              | 0,00                | 54,68                  | 53,23              | 1,16               | 0,00  | 0,00 | 0,00  |
| Hazelnuts                      | 7,35                  | 0,00   | 0,00     | 5,10     | 2,08    | 75,14               | 74,74 <sup>1</sup> | 0,00                | 13,04                  | 12,89 <sup>1</sup> | 0,14 <sup>3</sup>  | 0,00  | 0,00 | 0,00  |
| Margarine (corn & soybean oil) | 18,82                 | 0,00   | 0,06     | 10,45    | 7,65    | 48,17               | 30,34              | 17,58               | 30,11                  | 26,67              | 2,42               | 0,00  | 0,00 | 0,00  |
| Mustard oil                    | 11,58                 |        | 1,39     | 3,75     | 1,12    | 59,19               | 11,61 <sup>1</sup> |                     | 21,23                  | 15,33 <sup>2</sup> | 5,90 <sup>3</sup>  |       |      |       |
| Olive oil (salad or cooking)   | 13,81                 | 0,00   | 0,00     | 11,29    | 1,95    | 72,96               | 71,27 <sup>1</sup> |                     | 10,52                  | 9,76 <sup>2</sup>  | 0,76 <sup>3</sup>  | 0,00  | 0,00 | 0,00  |
| Palm oil                       | 49,30                 | 0,10   | 1,00     | 43,50    | 4,30    | 37,00               | 36,60 <sup>1</sup> |                     | 9,30                   | 9,10               | 0,20 <sup>3</sup>  | 0,00  | 0,00 | 0,00  |
| Poppy seeds                    | 10,87                 | 0,00   | 0,19     | 8,62     | 1,88    | 14,39               | 14,11              | 0,00                | 68,74                  | 68,08 <sup>2</sup> | 0,66               | 0,00  | 0,00 | 0,00  |
| Rape (canola) oil              | 7,37                  | 0,00   | 0,00     | 4,30     | 2,09    | 63,28               | 61,71              | 0,03                | 28,14                  | 18,64              | 9,14               | 0,00  | 0,00 | 0,00  |
| Soybean oil                    | 15,65                 | 0,00   | 0,00     | 10,46    | 4,44    | 22,78               | 22,55              | 0,00                | 57,74                  | 50,42              | 6,79               | 0,00  | 0,00 | 0,00  |
| Sunflower oil, high-oleic      | 9,86                  | 0,00   | 0,06     | 3,68     | 4,32    | 83,69               | 82,63 <sup>1</sup> |                     | 3,80                   | 3,61 <sup>2</sup>  | 0,19 <sup>3</sup>  | 0,00  | 0,00 | 0,00  |
| Sunflower oil, linoleic        | 10,30                 | 0,00   | 0,00     | 5,90     | 4,50    | 19,50               | 19,50 <sup>1</sup> |                     | 65,70                  | 65,70 <sup>2</sup> | 0,00               | 0,00  | 0,00 | 0,00  |
| Walnuts, English               | 9,39                  | 0,00   | 0,00     | 6,75     | 2,54    | 13,70               | 13,49 <sup>1</sup> |                     | 72,34                  | 58,42 <sup>2</sup> | 13,92 <sup>3</sup> | 0,00  | 0,00 | 0,00  |

Notes: ALA =  $\alpha$ -linolenic acid, EPA = eicosapentaenoic acid, DHA = docosahexaenoic acid.

\*Includes this fatty acid, unless stated otherwise.

\*\*Undifferentiated 20:4. Equals to arachidonic acid (ARA) (20:4, n-6) in animal fat.

<sup>1</sup>Undifferentiated 18:1. May include vaccenic acid (18:1t, n-7) found in animal fat, or elaidic acid (18:1t, n-9) found in hydrogenated plant oils (margarines).

<sup>2</sup>Undifferentiated 18:2. May include rumenic acid (18:2t, n-7) found in animal fat.

<sup>3</sup>Undifferentiated 18:3. May include  $\gamma$ -linolenic acid (18:3, n-6) and some conjugated 18:3 fatty acids.

Source: After the USDA.gov database [41].

Supplementary Table 2. Glycaemic index and insulin index in selected foods. A comparison of 1000 kJ-portions, relative to glucose.

| GLYCAEMIC INDEX                   |       | INSULIN INDEX                     |       |
|-----------------------------------|-------|-----------------------------------|-------|
| Glucose                           | 100   | Glucose                           | 100   |
| Potatoes (boiled)                 | 78    | Potatoes (boiled)                 | 88    |
| „Whole-meal bread“ (Australia)    | 74    | Baked beans                       | 88    |
| White rice                        | 72    | White bread                       | 73    |
| Brown rice                        | 72    | „Whole-meal bread“ (Australia)    | 70    |
| White bread                       | 70    | Ice tea (Narkena Ltd.)            | 69    |
| Beer (4.9% alcohol)               | 66    | Black grapes                      | 60    |
| Pizza                             | 60    | Skim-fat milk (0.1%)              | 60    |
| Ice tea (Narkena Ltd.)            | 59    | Bananas                           | 59    |
| Coca-Cola                         | 53    | White rice                        | 58    |
| Bananas                           | 52    | Low-fat cottage cheese (2.3% fat) | 52    |
| Black grapes                      | 50    | Pizza                             | 47    |
| Spiral white pasta                | 46    | Brown rice                        | 45    |
| „Grain bread“ (Australia)         | 36-50 | Coca-Cola                         | 44    |
| Baked beans                       | 44    | Oranges                           | 44    |
| Oranges                           | 42    | Apples (Red delicious)            | 43    |
| Lentils served with tomato sauce  | 37    | Lentils served with tomato sauce  | 42    |
| Apples (Red delicious)            | 36    | „Grain bread“ (Australia)         | 41-52 |
| Whole-fat milk (3.8%)             | 31    | Beef steak                        | 37    |
| Low-fat milk (1.0%)               | 29    | Low-fat milk (1.0%)               | 34    |
| Skim-fat milk (0.1%)              | 29    | Cheddar cheese (35.6% fat)        | 33    |
| Hot-dog (sausage)                 | 28    | Spiral white pasta                | 29    |
| Low-fat cottage cheese (2.3% fat) | 0     | Whole-fat milk (3.8%)             | 24    |
| Beef steak                        | 0     | Eggs (poached)                    | 23    |
| Cheddar cheese (35.6% fat)        | 0     | Beer (4.9% alcohol)               | 20    |
| Eggs (poached)                    | 0     | Chicken (fried in olive oil)      | 19    |
| Chicken (fried in olive oil)      | 0     | Cream cheese (35.3% fat)          | 18    |
| Cream cheese (35.3% fat)          | 0     | Hot-dog (sausage)                 | 16    |
| Tuna (canned in oil)              | 0     | Tuna (canned in oil)              | 16    |
| Walnuts                           | 0     | Walnuts                           | 5     |
| Avocado                           | 0     | Avocado                           | 4     |
| Olive oil                         | 0     | Olive oil                         | 3     |
| White wine (11% alcohol)          | 0     | White wine (11% alcohol)          | 3     |
| Butter                            | 0     | Butter                            | 2     |
| Gin (40% alcohol)                 | 0     | Gin (40% alcohol)                 | 1     |

Source: After Bao et al. [32].

Supplementary Table 3a. Raised blood pressure (Men): Parsimonious models of the ridge regression, LASSO regression and elastic net regression, computed by the bootstrapping method and sorted according to the absolute *beta* coefficients of the ridge regression and elastic net regression. In the ridge regression, all food items that reach a non-zero value in the elastic net regression are listed.

| VARIABLES                      | Ridge  |          | LASSO  |          | VARIABLES                      | Elastic net |          |
|--------------------------------|--------|----------|--------|----------|--------------------------------|-------------|----------|
|                                | Beta   | absolute | Beta   | absolute |                                | Beta        | absolute |
| Vegetables total               | -0,079 | 0,079    | 0      | 0        | Total fat & Animal protein     | -0,141      | 0,141    |
| Raised cholesterol             | -0,071 | 0,071    | 0      | 0        | Total fat & Total protein      | -0,114      | 0,114    |
| % PC CARB energy               | 0,066  | 0,066    | 0      | 0        | % CA energy                    | 0,084       | 0,084    |
| Cheese                         | -0,065 | 0,065    | 0      | 0        | % PC CARB energy               | 0,068       | 0,068    |
| Oilcrops total                 | -0,063 | 0,063    | 0      | 0        | Tree nuts                      | -0,061      | 0,061    |
| Health expenditure (1995-2008) | -0,058 | 0,058    | 0      | 0        | Health expenditure (2008)      | -0,060      | 0,060    |
| Refined sugar                  | -0,057 | 0,057    | 0      | 0        | Health expenditure (1995-2008) | -0,050      | 0,050    |
| Plant fat                      | -0,053 | 0,053    | 0      | 0        | Cheese                         | -0,035      | 0,035    |
| Tree nuts                      | -0,052 | 0,052    | 0      | 0        | Total fat                      | -0,027      | 0,027    |
| Health expenditure (2008)      | -0,052 | 0,052    | 0      | 0        | Fruits total                   | -0,026      | 0,026    |
| Rye                            | 0,050  | 0,050    | 0      | 0        | Plant fat                      | -0,020      | 0,020    |
| Total fat & Animal protein     | -0,049 | 0,049    | -0,376 | 0,376    | Oranges & Mandarins            | -0,004      | 0,004    |
| % CA energy                    | 0,049  | 0,049    | 0      | 0        |                                |             |          |
| Fruits total                   | -0,048 | 0,048    | 0      | 0        |                                |             |          |
| Honey                          | -0,048 | 0,048    | 0      | 0        |                                |             |          |
| Total fat & Total protein      | -0,048 | 0,048    | 0      | 0        |                                |             |          |
| Oranges & Mandarins            | -0,046 | 0,046    | 0      | 0        |                                |             |          |
| Cocoa beans                    | -0,044 | 0,044    | 0      | 0        |                                |             |          |
| Distilled alcohol              | 0,043  | 0,043    | 0      | 0        |                                |             |          |
| Lard                           | 0,041  | 0,041    | 0      | 0        |                                |             |          |
| Ref. sugar & Sweeteners total  | -0,039 | 0,039    | 0      | 0        |                                |             |          |
| Fish & Seafood                 | 0,039  | 0,039    | 0      | 0        |                                |             |          |
| Beer                           | 0,038  | 0,038    | 0      | 0        |                                |             |          |
| PC CARB energy                 | 0,038  | 0,038    | 0      | 0        |                                |             |          |
| Milk                           | 0,037  | 0,037    | 0      | 0        |                                |             |          |
| Sunflower oil                  | 0,036  | 0,036    | 0      | 0        |                                |             |          |
| Total energy                   | -0,036 | 0,036    | 0      | 0        |                                |             |          |
| Poultry                        | -0,035 | 0,035    | 0      | 0        |                                |             |          |
| Plant protein                  | -0,033 | 0,033    | 0      | 0        |                                |             |          |
| Milk products (dairy) total    | 0,031  | 0,031    | 0      | 0        |                                |             |          |
| CA energy                      | 0,031  | 0,031    | 0      | 0        |                                |             |          |
| Pork                           | 0,030  | 0,030    | 0      | 0        |                                |             |          |
| Total fat                      | -0,030 | 0,030    | 0      | 0        |                                |             |          |

Supplementary Table 3b. Raised blood pressure (Men): Results of the elastic net regression (a model with the lowest prediction error).

| Model | Ridge Penalty | Lasso Penalty | Regularization "R Square" (1-Error) | Number of selected predictors | Standardized sum of beta-coefficients | Apparent prediction error | Expected prediction error |            |    |
|-------|---------------|---------------|-------------------------------------|-------------------------------|---------------------------------------|---------------------------|---------------------------|------------|----|
|       |               |               |                                     |                               |                                       |                           | Estimate                  | Std. Error | N  |
| 548   | 1,000         | 0,740         | 0,796                               | 14                            | 0,216                                 | 0,204                     | 0,383                     | 0,116      | 41 |

| VARIABLES                      | Beta   | absolute |
|--------------------------------|--------|----------|
| Total fat & Animal protein     | -0,149 | 0,149    |
| Total fat & Total protein      | -0,126 | 0,126    |
| % CA energy                    | 0,098  | 0,098    |
| Tree nuts                      | -0,096 | 0,096    |
| % PC CARB energy               | 0,095  | 0,095    |
| Health expenditure (2008)      | -0,077 | 0,077    |
| Cheese                         | -0,070 | 0,070    |
| Health expenditure (1995-2008) | -0,064 | 0,064    |
| Plant fat                      | -0,050 | 0,050    |
| Fruits total                   | -0,048 | 0,048    |
| Total fat                      | -0,034 | 0,034    |
| Oranges & Mandarins            | -0,033 | 0,033    |
| Raised cholesterol             | -0,013 | 0,013    |
| Olive oil                      | -0,003 | 0,003    |

Supplementary Table 4a. Raised blood pressure (Women): Parsimonious models of the ridge regression, LASSO regression and elastic net regression, computed by the bootstrapping method and sorted according to the absolute *beta* coefficients of the ridge regression and elastic net regression. In the ridge regression, all food items that reach a non-zero value in the elastic net regression are listed.

| VARIABLES                      | Ridge  |          | LASSO  |          | VARIABLES                      | Elastic net |          |
|--------------------------------|--------|----------|--------|----------|--------------------------------|-------------|----------|
|                                | Beta   | absolute | Beta   | absolute |                                | Beta        | absolute |
| Oranges & Mandarins            | -0,055 | 0,055    | -0,069 | 0,069    | Health expenditure (1995-2008) | -0,184      | 0,184    |
| Fish & Seafood fat             | -0,049 | 0,049    | 0      | 0        | Health expenditure (2008)      | -0,164      | 0,164    |
| Health expenditure (1995-2008) | -0,048 | 0,048    | -0,470 | 0,470    | Oranges & Mandarins            | -0,136      | 0,136    |
| Total protein                  | -0,048 | 0,048    | -0,014 | 0,014    | Total fat & Total protein      | -0,103      | 0,103    |
| Health expenditure (2008)      | -0,041 | 0,041    | -0,176 | 0,176    | Total fat & Animal protein     | -0,080      | 0,080    |
| Meat protein                   | -0,040 | 0,040    | 0      | 0        | % PC CARB energy               | 0,079       | 0,079    |
| Animal protein                 | -0,038 | 0,038    | 0      | 0        | Animal protein                 | -0,071      | 0,071    |
| Total fat & Total protein      | -0,037 | 0,037    | 0      | 0        | Total fat                      | -0,069      | 0,069    |
| Cheese                         | -0,036 | 0,036    | 0      | 0        | % CA energy                    | 0,049       | 0,049    |
| % CA energy                    | 0,034  | 0,034    | 0      | 0        | Cheese                         | -0,044      | 0,044    |
| % PC CARB energy               | 0,031  | 0,031    | 0,034  | 0,034    | Meat protein                   | -0,037      | 0,037    |
| Total fat & Animal protein     | -0,029 | 0,029    | -0,003 | 0,003    | Total protein                  | -0,016      | 0,016    |
| Total fat                      | -0,023 | 0,023    | 0      | 0        | Fish & Seafood fat             | -0,013      | 0,013    |
| Fruits total                   | -0,020 | 0,020    | 0      | 0        | Fruits total                   | -0,002      | 0,002    |

Supplementary Table 4b. Raised blood pressure (Women): Results of the elastic net regression (a model with the lowest prediction error).

| Model | Ridge Penalty | Lasso Penalty | Regularization "R Square" (1-Error) | Number of selected predictors | Standardized sum of beta-coefficients | Apparent prediction error | Expected prediction error |            |    |
|-------|---------------|---------------|-------------------------------------|-------------------------------|---------------------------------------|---------------------------|---------------------------|------------|----|
|       |               |               |                                     |                               |                                       |                           | Estimate                  | Std. Error | N  |
| 172   | 0,300         | 0,360         | 0,910                               | 16                            | 0,088                                 | 0,090                     | 0,185                     | 0,060      | 42 |

| VARIABLES                      | Beta   | absolute |
|--------------------------------|--------|----------|
| Health expenditure (1995-2008) | -0,213 | 0,213    |
| Health expenditure (2008)      | -0,163 | 0,163    |
| Oranges & Mandarins            | -0,162 | 0,162    |
| % PC CARB energy               | 0,083  | 0,083    |
| Total fat & Total protein      | -0,066 | 0,066    |
| Total fat & Animal protein     | -0,056 | 0,056    |
| Cheese                         | -0,048 | 0,048    |
| Animal protein                 | -0,045 | 0,045    |
| Meat protein                   | -0,043 | 0,043    |
| Total protein                  | -0,037 | 0,037    |
| Fish & Seafood fat             | -0,035 | 0,035    |
| % CA energy                    | 0,034  | 0,034    |
| Total fat                      | -0,020 | 0,020    |
| Oilcrops total                 | -0,016 | 0,016    |
| Plant fat                      | -0,004 | 0,004    |
| Refined sugar                  | -0,004 | 0,004    |

Supplementary Table 5a. Actual total CVD mortality (Men): Parsimonious models of the ridge regression, LASSO regression and elastic net regression, computed by the bootstrapping method and sorted according to the absolute *beta* coefficients of the ridge regression and elastic net regression. In the ridge regression, all food items that reach a non-zero value in the elastic net regression are listed.

| VARIABLES                      | Ridge  |          | LASSO  |          | VARIABLES                      | Elastic net |          |
|--------------------------------|--------|----------|--------|----------|--------------------------------|-------------|----------|
|                                | Beta   | absolute | Beta   | absolute |                                | Beta        | absolute |
| Health expenditure (1995-2008) | -0,056 | 0,056    | -0,064 | 0,064    | Oranges & Mandarins            | -0,150      | 0,150    |
| Tree nuts                      | -0,056 | 0,056    | 0      | 0        | Health expenditure (2008)      | -0,144      | 0,144    |
| Distilled beverages            | 0,054  | 0,054    | 0      | 0        | Health expenditure (1995-2008) | -0,142      | 0,142    |
| Olive oil                      | -0,054 | 0,054    | 0      | 0        | Fruits total                   | -0,063      | 0,063    |
| Health expenditure (2008)      | -0,053 | 0,053    | -0,293 | 0,293    | Total fat                      | -0,055      | 0,055    |
| Sunflower oil                  | 0,051  | 0,051    | 0      | 0        | Total fat & Animal protein     | -0,035      | 0,035    |
| Poultry                        | -0,051 | 0,051    | 0      | 0        |                                |             |          |
| Oranges & Mandarins            | -0,050 | 0,050    | -0,235 | 0,235    |                                |             |          |
| PC CARB energy                 | -0,049 | 0,049    | 0      | 0        |                                |             |          |
| Cereals total                  | -0,048 | 0,048    | 0      | 0        |                                |             |          |
| Raised cholesterol             | -0,048 | 0,048    | 0      | 0        |                                |             |          |
| % Plant food energy            | -0,047 | 0,047    | 0      | 0        |                                |             |          |
| Bananas                        | -0,046 | 0,046    | 0      | 0        |                                |             |          |
| Total fat                      | -0,043 | 0,043    | 0      | 0        |                                |             |          |
| Animal fat                     | 0,042  | 0,042    | 0      | 0        |                                |             |          |
| Soybean oil                    | -0,041 | 0,041    | 0      | 0        |                                |             |          |
| Total fat & Animal protein     | -0,040 | 0,040    | 0      | 0        |                                |             |          |
| Fruits total                   | -0,039 | 0,039    | 0      | 0        |                                |             |          |

Supplementary Table 5b. Actual total CVD mortality (Men): Results of the elastic net regression (a model with the lowest prediction error).

| Model | Ridge Penalty | Lasso Penalty | Regularization "R Square" (1-Error) | Number of selected predictors | Standardized sum of beta-coefficients | Apparent prediction error | Expected prediction error |            |    |
|-------|---------------|---------------|-------------------------------------|-------------------------------|---------------------------------------|---------------------------|---------------------------|------------|----|
|       |               |               |                                     |                               |                                       |                           | Estimate                  | Std. Error | N  |
| 281   | 0,500         | 0,500         | 0,869                               | 10                            | 0,179                                 | 0,131                     | 0,230                     | 0,092      | 41 |

| VARIABLES                      | Beta   | absolute |
|--------------------------------|--------|----------|
| Oranges & Mandarins            | -0,193 | 0,193    |
| Health expenditure (2008)      | -0,173 | 0,173    |
| Health expenditure (1995-2008) | -0,169 | 0,169    |
| Total fat & Total protein      | -0,120 | 0,120    |
| Total fat                      | -0,085 | 0,085    |
| Olive oil                      | -0,078 | 0,078    |
| Fruits total                   | -0,076 | 0,076    |
| Tree nuts                      | -0,069 | 0,069    |
| % CA energy                    | 0,026  | 0,026    |
| Total energy                   | -0,012 | 0,012    |

Supplementary Table 6a. Actual total CVD mortality (Women): Parsimonious models of the ridge regression, LASSO regression and elastic net regression, computed by the bootstrapping method and sorted according to the absolute *beta* coefficients of the ridge regression and elastic net regression. In the ridge regression, all food items that reach a non-zero value in the elastic net regression are listed.

| VARIABLES                      | Ridge  |          | LASSO  |          | VARIABLES                 | Elastic net |          |
|--------------------------------|--------|----------|--------|----------|---------------------------|-------------|----------|
|                                | Beta   | absolute | Beta   | absolute |                           | Beta        | absolute |
| BMI (1990-2008)                | 0,101  | 0,101    | 0      | 0        | Oranges & Mandarins       | -0,143      | 0,143    |
| Smoking (1990-2009)            | -0,087 | 0,087    | -0,079 | 0,079    | Fruits total              | -0,133      | 0,133    |
| Grapes                         | -0,080 | 0,080    | 0      | 0        | Smoking (1990-2009)       | -0,127      | 0,127    |
| Alcoholic beverages total      | -0,078 | 0,078    | 0      | 0        | BMI (1990-2008)           | 0,123       | 0,123    |
| Eggs total                     | 0,073  | 0,073    | 0      | 0        | Alcoholic beverages total | -0,116      | 0,116    |
| Coffee                         | -0,072 | 0,072    | -0,027 | 0,027    | Coffee                    | -0,114      | 0,114    |
| Fruits total                   | -0,066 | 0,066    | -0,044 | 0,044    | Cheese                    | -0,092      | 0,092    |
| Cheese                         | -0,064 | 0,064    | 0      | 0        | Potatoes                  | 0,072       | 0,072    |
| Oranges & Mandarins            | -0,063 | 0,063    | -0,077 | 0,077    | Total protein             | -0,069      | 0,069    |
| Wine                           | -0,063 | 0,063    | 0      | 0        | Wine                      | -0,028      | 0,028    |
| Cereals total                  | -0,061 | 0,061    | 0      | 0        | Tree nuts                 | -0,006      | 0,006    |
| Potatoes                       | 0,059  | 0,059    | 0      | 0        | Total fat                 | -0,006      | 0,006    |
| Total protein                  | -0,059 | 0,059    | 0      | 0        |                           |             |          |
| Fish & Seafood                 | 0,054  | 0,054    | 0      | 0        |                           |             |          |
| PC CARB energy                 | -0,052 | 0,052    | 0      | 0        |                           |             |          |
| Tree nuts                      | -0,051 | 0,051    | 0      | 0        |                           |             |          |
| Total energy                   | -0,051 | 0,051    | 0      | 0        |                           |             |          |
| Honey                          | 0,050  | 0,050    | 0      | 0        |                           |             |          |
| Health expenditure (1995-2008) | -0,050 | 0,050    | 0      | 0        |                           |             |          |
| Total fat                      | -0,049 | 0,049    | 0      | 0        |                           |             |          |

Supplementary Table 6b. Actual total CVD mortality (Women): Results of the elastic net regression (a model with the lowest prediction error).

| Model | Ridge Penalty | Lasso Penalty | Regularization "R Square" (1-Error) | Number of selected predictors | Standardized sum of beta-coefficients | Apparent prediction error | Expected prediction error |            |    |
|-------|---------------|---------------|-------------------------------------|-------------------------------|---------------------------------------|---------------------------|---------------------------|------------|----|
|       |               |               |                                     |                               |                                       |                           | Estimate                  | Std. Error | N  |
| 259   | 0,500         | 0,060         | 0,905                               | 53                            | 0,637                                 | 0,095                     | 0,523                     | 0,176      | 36 |

| VARIABLES                      | Beta   | absolute | VARIABLES                      | Beta   | absolute |
|--------------------------------|--------|----------|--------------------------------|--------|----------|
| Smoking (1990-2009)            | -0,174 | 0,174    | Soybean oil                    | -0,044 | 0,044    |
| BMI (1990-2008)                | 0,161  | 0,161    | Rye                            | 0,044  | 0,044    |
| Alcoholic beverages total      | -0,159 | 0,159    | % CA energy                    | 0,039  | 0,039    |
| Cheese                         | -0,153 | 0,153    | Onions                         | 0,036  | 0,036    |
| Coffee                         | -0,145 | 0,145    | Beef & pork fat                | 0,036  | 0,036    |
| Eggs total                     | 0,144  | 0,144    | Maize                          | -0,036 | 0,036    |
| Potatoes                       | 0,139  | 0,139    | Edible offals                  | 0,033  | 0,033    |
| Grapes                         | -0,137 | 0,137    | Plant protein                  | -0,031 | 0,031    |
| Wine                           | -0,135 | 0,135    | Refined sugar                  | 0,030  | 0,030    |
| Honey                          | 0,114  | 0,114    | % PC CARB energy               | 0,028  | 0,028    |
| Total protein                  | -0,112 | 0,112    | Distilled alcohol              | 0,027  | 0,027    |
| Cereals total                  | -0,102 | 0,102    | % Plant food energy            | 0,025  | 0,025    |
| Total energy                   | -0,098 | 0,098    | Dairy protein                  | 0,025  | 0,025    |
| Health expenditure (1995-2008) | -0,097 | 0,097    | CA energy                      | 0,024  | 0,024    |
| Total fat                      | -0,096 | 0,096    | Butter & Ghee                  | 0,023  | 0,023    |
| Fish & Seafood                 | 0,094  | 0,094    | Poultry                        | -0,019 | 0,019    |
| Tree nuts                      | -0,090 | 0,090    | Plant oils total               | 0,016  | 0,016    |
| Fish & Seafood fat             | 0,077  | 0,077    | Total fat & Animal protein     | -0,014 | 0,014    |
| Sunflower oil                  | 0,071  | 0,071    | Total fat & Total protein      | -0,013 | 0,013    |
| Health expenditure (2008)      | -0,069 | 0,069    | Wheat                          | -0,012 | 0,012    |
| Legumes total                  | -0,064 | 0,064    | Refined sugar&Sweeteners total | 0,005  | 0,005    |
| Beer                           | -0,062 | 0,062    | Meat fat                       | 0,004  | 0,004    |
| Oilcrops total                 | 0,059  | 0,059    | Tomatoes                       | 0,001  | 0,001    |
| PC CARB energy                 | -0,057 | 0,057    | Meat protein                   | -0,001 | 0,001    |
| Pork                           | -0,056 | 0,056    | Meat total                     | -0,001 | 0,001    |
| Milk                           | 0,048  | 0,048    | Dairy fat                      | 0,001  | 0,001    |
| Lard                           | 0,045  | 0,045    |                                |        |          |

*Supplementary Table 7.* Actual total CVD mortality in men: The first row displays results of the dependent t-test (standard deviations of the mean difference between pairs of r-values). The lower the number, the closer the temporal relationship between two trend lines. The second row displays results of the regression slope test (probability p-values expressing the similarity between linear slopes of two trend lines). The higher the p-value, the higher the probability that two linear trend lines are running parallel to each other. (See Figs. S23-S24)

|              | Health expenditure | TF & AP         | Fruits          | Bananas         | Oranges & Mandarins | Wine            | Coffee          | Cheese          | % CA energy     | Cereals         | Potatoes        | Distilled beverages | Onions          |
|--------------|--------------------|-----------------|-----------------|-----------------|---------------------|-----------------|-----------------|-----------------|-----------------|-----------------|-----------------|---------------------|-----------------|
| Health exp.  | -                  |                 |                 |                 |                     |                 |                 |                 |                 |                 |                 |                     |                 |
| TF & AP      | 0.027<br>p=0.38    | -               |                 |                 |                     |                 |                 |                 |                 |                 |                 |                     |                 |
| Fruits       | 0.038<br>p=0.05    | 0.038<br>p=0.05 | -               |                 |                     |                 |                 |                 |                 |                 |                 |                     |                 |
| Bananas      | 0.031<br>p=0.01    | 0.087<br>p=0.01 | 0.079<br>p=0.27 | -               |                     |                 |                 |                 |                 |                 |                 |                     |                 |
| Or & Mand.   | 0.071              | 0.090           | 0.060           | 0.070<br>p=0.14 | -                   |                 |                 |                 |                 |                 |                 |                     |                 |
| Wine         | 0.045              | 0.056           | 0.075           | 0.102           | 0.122               | -               |                 |                 |                 |                 |                 |                     |                 |
| Coffee       | 0.067              | 0.068           | 0.051<br>p=0.01 | 0.074<br>p=0.29 | 0.059<br>p=0.54     | 0.111           | -               |                 |                 |                 |                 |                     |                 |
| Cheese       | 0.025              | 0.026<br>p=0.05 | 0.027<br>p=0.05 | 0.073           | 0.072               | 0.067           | 0.052           | -               |                 |                 |                 |                     |                 |
| %CA energy   | 0.021<br>p=0.12    | 0.049<br>p=0.87 | 0.052<br>p=0.01 | 0.060<br>p=0.01 | 0.084               | 0.047           | 0.075           | 0.043           | -               |                 |                 |                     |                 |
| Cereals      | 0.065              | 0.078           | 0.100           | 0.129           | 0.148               | 0.033           | 0.135           | 0.093           | 0.076           | -               |                 |                     |                 |
| Potatoes     | 0.078              | 0.088           | 0.075           | 0.080<br>p=0.05 | 0.074<br>p=0.61     | 0.127           | 0.049<br>p=0.24 | 0.071           | 0.091           | 0.156           | -               |                     |                 |
| Dist. bever. | 0.092<br>p=0.48    | 0.072<br>p=0.75 | 0.100<br>p=0.18 | 0.135<br>p=0.06 | 0.150               | 0.096<br>p=0.21 | 0.109<br>p=0.01 | 0.089<br>p=0.12 | 0.104<br>r=0.69 | 0.107<br>p=0.03 | 0.122           | -                   |                 |
| Onions       | 0.107              | 0.112           | 0.101           | 0.108<br>p=0.04 | 0.094<br>p=0.32     | 0.151           | 0.075<br>p=0.14 | 0.099           | 0.119           | 0.178           | 0.050<br>p=0.51 | 0.138               | -               |
| Sunfl. oil   | 0.097              | 0.109           | 0.084           | 0.096           | 0.060<br>p=0.03     | 0.151           | 0.063           | 0.091           | 0.113           | 0.179           | 0.048<br>p=0.09 | 0.148               | 0.069<br>p=0.60 |

*Abbreviations:* TF & AP = Total fat & Animal protein, Or & Mand = Oranges & Mandarins, % CA energy = % energy from carbohydrates and alcohol in the diet.



*Supplementary Table 8.* Actual total CVD mortality in women: The first row displays results of the dependent t-test (standard deviations of the mean difference between pairs of r-values). The lower the number, the closer the temporal relationship between two trend lines. The second row displays results of the regression slope test (probability p-values expressing the similarity between linear slopes of two trend lines). The higher the p-value, the higher the probability that two linear trend lines are running parallel to each other. (See Figs. 19-20)

|               | Health expenditure | TF & AP         | Fruits          | Bananas         | Oranges & Mandarins | Wine            | Coffee          | Cheese          | % CA energy     | Cereals         | Potatoes        | Distilled beverages | Onions          |
|---------------|--------------------|-----------------|-----------------|-----------------|---------------------|-----------------|-----------------|-----------------|-----------------|-----------------|-----------------|---------------------|-----------------|
| Health exp.   | -                  |                 |                 |                 |                     |                 |                 |                 |                 |                 |                 |                     |                 |
| TF & AP       | 0.021<br>p=0.52    | -               |                 |                 |                     |                 |                 |                 |                 |                 |                 |                     |                 |
| Fruits        | 0.031<br>p=0.20    | 0.028<br>p=0.16 | -               |                 |                     |                 |                 |                 |                 |                 |                 |                     |                 |
| Bananas       | 0.032              | 0.078           | 0.073<br>p=0.05 | -               |                     |                 |                 |                 |                 |                 |                 |                     |                 |
| Or & Mand.    | 0.062              | 0.079           | 0.061           | 0.062<br>p=0.41 | -                   |                 |                 |                 |                 |                 |                 |                     |                 |
| Wine          | 0.056              | 0.062           | 0.078           | 0.114           | 0.124               | -               |                 |                 |                 |                 |                 |                     |                 |
| Coffee        | 0.072              | 0.072           | 0.057           | 0.071<br>p=0.29 | 0.058<br>p=0.81     | 0.125           | -               |                 |                 |                 |                 |                     |                 |
| Cheese        | 0.024              | 0.019           | 0.026<br>p=0.98 | 0.069           | 0.068               | 0.076           | 0.059           | -               |                 |                 |                 |                     |                 |
| % CA energy   | 0.015<br>p=0.18    | 0.036<br>p=0.99 | 0.040<br>p=0.09 | 0.062<br>p=0.09 | 0.071               | 0.060           | 0.076           | 0.037           | -               |                 |                 |                     |                 |
| Cereals       | 0.053              | 0.063           | 0.078           | 0.120           | 0.127               | 0.020<br>p=0.90 | 0.126           | 0.077           | 0.065           | -               |                 |                     |                 |
| Potatoes      | 0.089              | 0.100           | 0.090           | 0.079<br>p=0.01 | 0.079<br>p=0.06     | 0.152           | 0.055<br>p=0.10 | 0.085           | 0.099           | 0.156           | -               |                     |                 |
| Dist. bev.    | 0.070<br>p=0.37    | 0.056<br>p=0.53 | 0.070<br>p=0.18 | 0.113<br>p=0.02 | 0.122               | 0.080<br>p=0.03 | 0.097           | 0.066<br>p=0.08 | 0.079<br>p=0.51 | 0.082<br>p=0.03 | 0.124           | -                   |                 |
| Onions        | 0.084              | 0.096           | 0.090           | 0.079<br>p=0.28 | 0.088<br>p=0.64     | 0.141           | 0.069<br>p=0.77 | 0.085           | 0.094           | 0.146           | 0.047<br>p=0.33 | 0.119               | -               |
| Sunflower oil | 0.098              | 0.114           | 0.098           | 0.085           | 0.067               | 0.168           | 0.061           | 0.098           | 0.112           | 0.171           | 0.042<br>p=0.16 | 0.140               | 0.078<br>p=0.04 |

*Abbreviations:* TF & AP = Total fat & Animal protein, Or & Mand = Oranges & Mandarins, % CA energy = % energy from carbohydrates and alcohol in the diet.

*Supplementary Table 9.* Raised blood pressure in men: The first row displays results of the dependent t-test (standard deviations of the mean difference between pairs of r-values). The lower the number, the closer the temporal relationship between two trend lines. The second row displays results of the regression slope test (probability p-values expressing the similarity between linear slopes of two trend lines). The higher the p-value, the higher the probability that two linear trend lines are running parallel to each other. (see Figs. S25-S26)

|             | Health exp.     | TF & AP         | Fruits          | Or & Mand.      | Wine  | Coffee          | Cheese          | Tree nuts       | Cereals         | Sunfl. oil      | Distilled beverages | Onions          | Potatoes        |
|-------------|-----------------|-----------------|-----------------|-----------------|-------|-----------------|-----------------|-----------------|-----------------|-----------------|---------------------|-----------------|-----------------|
| Health exp. | -               |                 |                 |                 |       |                 |                 |                 |                 |                 |                     |                 |                 |
| TF & AP     | 0.011<br>p=0.04 | -               |                 |                 |       |                 |                 |                 |                 |                 |                     |                 |                 |
| Fruits      | 0.044           | 0.069           | -               |                 |       |                 |                 |                 |                 |                 |                     |                 |                 |
| Or & Mand.  | 0.077           | 0.092           | 0.043<br>p=0.10 | -               |       |                 |                 |                 |                 |                 |                     |                 |                 |
| Wine        | 0.093           | 0.098           | 0.158           | 0.184           | -     |                 |                 |                 |                 |                 |                     |                 |                 |
| Coffee      | 0.057           | 0.061           | 0.063<br>p=0.35 | 0.070<br>p=0.02 | 0.147 | -               |                 |                 |                 |                 |                     |                 |                 |
| Cheese      | 0.025<br>p=0.93 | 0.028<br>p=0.20 | 0.064           | 0.085           | 0.110 | 0.060           | -               |                 |                 |                 |                     |                 |                 |
| Tree nuts   | 0.044<br>p=0.33 | 0.045<br>p=0.76 | 0.065           | 0.093           | 0.104 | 0.086<br>p=0.01 | 0.040<br>p=0.29 | -               |                 |                 |                     |                 |                 |
| Cereals     | 0.070           | 0.070           | 0.127           | 0.155           | 0.048 | 0.113           | 0.080           | 0.083           | -               |                 |                     |                 |                 |
| Sunfl. oil  | 0.048<br>p=0.09 | 0.044           | 0.071<br>p=0.05 | 0.080           | 0.129 | 0.061<br>p=0.36 | 0.058           | 0.075<br>p=0.06 | 0.102           | -               |                     |                 |                 |
| Dist. bev.  | 0.114<br>p=0.58 | 0.104<br>p=0.76 | 0.144<br>p=0.04 | 0.166<br>p=0.01 | 0.132 | 0.125<br>p=0.12 | 0.124<br>p=0.49 | 0.135<br>p=0.86 | 0.104<br>p=0.10 | 0.106<br>p=0.26 | -                   |                 |                 |
| Onions      | 0.070           | 0.077           | 0.068<br>p=0.87 | 0.075<br>p=0.15 | 0.159 | 0.076<br>p=0.56 | 0.085           | 0.091           | 0.128           | 0.063<br>p=0.17 | 0.124<br>p=0.07     | -               |                 |
| Potatoes    | 0.033<br>p=0.90 | 0.046<br>p=0.43 | 0.062           | 0.090           | 0.115 | 0.077<br>p=0.05 | 0.048<br>p=0.85 | 0.046<br>p=0.43 | 0.087           | 0.064<br>p=0.24 | 0.121<br>p=0.57     | 0.075<br>p=0.02 | -               |
| % CA energy | 0.036           | 0.035<br>p=0.01 | 0.085           | 0.115           | 0.083 | 0.076           | 0.046           | 0.055<br>p=0.21 | 0.045           | 0.070           | 0.097<br>p=0.73     | 0.093           | 0.051<br>p=0.03 |

*Abbreviations:* TF & AP = Total fat & Animal protein, Or & Mand = Oranges & Mandarins, % CA energy = % energy from carbohydrates and alcohol in the diet.

*Supplementary Table 10.* Raised blood pressure in women: The first row displays results of the dependent t-test (standard deviations of the mean difference between pairs of r-values). The lower the number, the closer the temporal relationship between two trend lines. The second row displays results of the regression slope test (probability p-values expressing the similarity between linear slopes of two trend lines). The higher the p-value, the higher the probability that two linear trend lines are running parallel to each other. (see Figs. 21-22)

|             | Health exp.     | TF & AP         | Fruits          | Or & Mand.      | Wine  | Coffee          | Cheese          | Tree nuts       | Cereals         | Sunfl. oil      | Distilled beverages | Onions          | Potatoes |
|-------------|-----------------|-----------------|-----------------|-----------------|-------|-----------------|-----------------|-----------------|-----------------|-----------------|---------------------|-----------------|----------|
| Health exp. | -               |                 |                 |                 |       |                 |                 |                 |                 |                 |                     |                 |          |
| TF & AP     | 0.011<br>p=0.82 | -               |                 |                 |       |                 |                 |                 |                 |                 |                     |                 |          |
| Fruits      | 0.043           | 0.051           | -               |                 |       |                 |                 |                 |                 |                 |                     |                 |          |
| Or & Mand.  | 0.054           | 0.060           | 0.043<br>p=0.99 | -               |       |                 |                 |                 |                 |                 |                     |                 |          |
| Wine        | 0.102           | 0.119           | 0.161           | 0.166           | -     |                 |                 |                 |                 |                 |                     |                 |          |
| Coffee      | 0.079           | 0.075           | 0.053<br>p=0.07 | 0.061<br>p=0.11 | 0.186 | -               |                 |                 |                 |                 |                     |                 |          |
| Cheese      | 0.018           | 0.018           | 0.060           | 0.066           | 0.113 | 0.086           | -               |                 |                 |                 |                     |                 |          |
| Tree nuts   | 0.042<br>p=0.56 | 0.042<br>p=0.62 | 0.064           | 0.061           | 0.122 | 0.100           | 0.040<br>p=0.75 | -               |                 |                 |                     |                 |          |
| Cereals     | 0.063           | 0.065           | 0.105           | 0.113           | 0.064 | 0.132           | 0.057           | 0.077           | -               |                 |                     |                 |          |
| Sunfl. oil  | 0.069           | 0.074           | 0.050<br>p=0.02 | 0.055<br>p=0.05 | 0.188 | 0.049<br>p=0.84 | 0.085           | 0.085           | 0.136           | -               |                     |                 |          |
| Dist. bev.  | 0.094<br>p=0.15 | 0.089<br>p=0.16 | 0.115           | 0.138<br>p=0.01 | 0.113 | 0.129           | 0.094<br>p=0.16 | 0.118<br>p=0.27 | 0.083<br>p=0.31 | 0.138           | -                   |                 |          |
| Onions      | 0.062<br>p=0.02 | 0.068<br>p=0.02 | 0.064           | 0.080<br>p=0.93 | 0.164 | 0.077<br>p=0.15 | 0.077           | 0.086<br>p=0.02 | 0.113           | 0.070<br>p=0.09 | 0.115<br>p=0.02     | -               |          |
| Potatoes    | 0.039           | 0.058           | 0.047<br>p=0.76 | 0.060<br>p=0.78 | 0.160 | 0.072<br>p=0.06 | 0.064           | 0.066<br>p=0.01 | 0.108           | 0.052<br>p=0.02 | 0.121<br>p=0.01     | 0.045<br>p=0.88 | -        |
| % CA energy | 0.028           | 0.031           | 0.070           | 0.081           | 0.094 | 0.099           | 0.027           | 0.050<br>p=0.06 | 0.040           | 0.100           | 0.082<br>p=0.73     | 0.083           | 0.072    |

*Abbreviations:* TF & AP = Total fat & Animal protein, Or & Mand = Oranges & Mandarins, % CA energy = % energy from carbohydrates and alcohol in the diet.

*Supplementary Table 11.* Comparison of CVD statistics from 1980 and 2000. Changes in CVD mortality rates between 1980 and 2000, and changes in the CHD / Stroke mortality ratio between 1980 and 2000.

|                | CHD mortality in 2000<br>(as a ratio of 1980) |       | Stroke mortality in 2000<br>(as a ratio of 1980) |       | Total CHD & stroke mortality<br>(as a ratio of 1980) |       | CHD / Stroke mortality<br>ratio (Men) |      | CHD / Stroke mortality<br>ratio (Women) |      |
|----------------|-----------------------------------------------|-------|--------------------------------------------------|-------|------------------------------------------------------|-------|---------------------------------------|------|-----------------------------------------|------|
|                | Men                                           | Women | Men                                              | Women | Men                                                  | Women | 1980                                  | 2000 | 1980                                    | 2000 |
| Armenia        | 1.11                                          | 0.85  | 1.07                                             | 1.18  | 1.10                                                 | 0.96  | 3.85                                  | 3.97 | 1.94                                    | 1.40 |
| Austria        | 0.57                                          | 0.50  | 0.41                                             | 0.50  | 0.53                                                 | 0.50  | 3.07                                  | 4.27 | 1.43                                    | 1.43 |
| Azerbaijan     | 1.16                                          | 1.27  | 0.71                                             | 0.81  | 1.03                                                 | 1.08  | 2.60                                  | 4.27 | 1.41                                    | 2.20 |
| Belarus        | 1.51                                          | 1.29  | 1.25                                             | 1.11  | 1.43                                                 | 1.21  | 2.32                                  | 2.80 | 1.20                                    | 1.38 |
| Belgium        | 0.44                                          | 0.44  | 0.53                                             | 0.58  | 0.46                                                 | 0.50  | 4.05                                  | 3.40 | 1.50                                    | 1.14 |
| Bulgaria       | 1.09                                          | 1.05  | 1.03                                             | 0.79  | 1.07                                                 | 0.88  | 1.26                                  | 1.33 | 0.58                                    | 0.77 |
| Estonia        | 0.81                                          | 0.77  | 1.02                                             | 0.66  | 0.86                                                 | 0.72  | 3.15                                  | 2.49 | 1.11                                    | 1.30 |
| France         | 0.54                                          | 0.43  | 0.40                                             | 0.50  | 0.49                                                 | 0.47  | 1.95                                  | 2.63 | 0.70                                    | 0.60 |
| Georgia        | 0.94                                          | 0.85  | 0.99                                             | 0.79  | 0.95                                                 | 0.83  | 2.01                                  | 1.91 | 1.23                                    | 1.32 |
| Greece         | 0.94                                          | 0.90  | 0.77                                             | 0.50  | 0.89                                                 | 0.65  | 2.45                                  | 3.00 | 0.63                                    | 1.13 |
| Hungary        | 0.83                                          | 0.86  | 0.80                                             | 0.61  | 0.82                                                 | 0.73  | 2.13                                  | 2.20 | 0.97                                    | 1.36 |
| Iceland        | 0.33                                          | 1.08  | 0.25                                             | 0.77  | 0.32                                                 | 0.92  | 7.31                                  | 9.75 | 1.00                                    | 1.40 |
| Ireland        | 0.42                                          | 0.29  | 0.42                                             | 0.45  | 0.42                                                 | 0.35  | 5.92                                  | 6.00 | 1.86                                    | 1.20 |
| Italy          | 0.44                                          | 0.38  | 0.36                                             | 0.40  | 0.41                                                 | 0.39  | 2.48                                  | 3.00 | 0.87                                    | 0.83 |
| Latvia         | 0.83                                          | 0.72  | 0.85                                             | 0.94  | 0.84                                                 | 0.81  | 2.83                                  | 2.79 | 1.42                                    | 1.10 |
| Lithuania      | 0.92                                          | 0.70  | 0.73                                             | 0.62  | 0.87                                                 | 0.66  | 3.07                                  | 3.87 | 1.27                                    | 1.44 |
| Luxembourg     | 0.41                                          | 0.22  | 0.40                                             | 0.65  | 0.41                                                 | 0.42  | 3.40                                  | 3.50 | 1.15                                    | 0.38 |
| Malta          | 0.34                                          | 0.35  | 0.22                                             | 0.44  | 0.31                                                 | 0.37  | 4.06                                  | 6.29 | 3.06                                    | 2.43 |
| Moldova        | 1.09                                          | 0.89  | 1.19                                             | 1.58  | 1.12                                                 | 1.13  | 2.37                                  | 2.16 | 1.92                                    | 1.08 |
| Netherlands    | 0.37                                          | 0.47  | 0.60                                             | 0.64  | 0.40                                                 | 0.53  | 6.13                                  | 3.78 | 1.73                                    | 1.29 |
| Poland         | 0.84                                          | 0.94  | 1.14                                             | 1.00  | 0.91                                                 | 0.97  | 3.32                                  | 2.44 | 1.06                                    | 1.00 |
| Portugal       | 0.54                                          | 0.58  | 0.47                                             | 0.40  | 0.50                                                 | 0.45  | 0.91                                  | 1.04 | 0.40                                    | 0.58 |
| Romania        | 1.55                                          | 1.33  | 1.41                                             | 1.09  | 1.49                                                 | 1.19  | 1.41                                  | 1.55 | 0.73                                    | 0.89 |
| Russia         | 1.33                                          | 1.15  | 1.36                                             | 1.22  | 1.34                                                 | 1.18  | 2.35                                  | 2.29 | 1.15                                    | 1.08 |
| Spain          | 0.68                                          | 0.56  | 0.42                                             | 0.33  | 0.59                                                 | 0.42  | 1.83                                  | 3.00 | 0.60                                    | 1.00 |
| Ukraine        | 1.40                                          | 1.23  | 1.28                                             | 1.11  | 1.36                                                 | 1.18  | 2.57                                  | 2.81 | 1.49                                    | 1.64 |
| United Kingdom | 0.38                                          | 0.40  | 0.48                                             | 0.47  | 0.40                                                 | 0.43  | 6.22                                  | 5.00 | 2.00                                    | 1.71 |

*Note:* Changes in CVD mortality rates between 1980 and 2000

|               |         |        |           |        |         |                |
|---------------|---------|--------|-----------|--------|---------|----------------|
| +41% and more | +21-40% | +1-20% | No change | -1-20% | -21-40% | -41 % and less |
|---------------|---------|--------|-----------|--------|---------|----------------|

*Source:* After Nichols et al. [9].

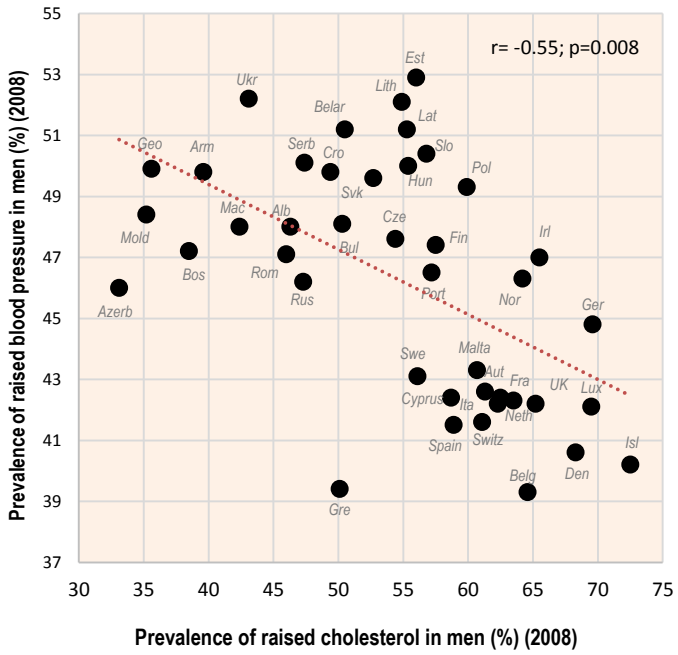

*Supplementary Fig. 1.* Correlation between the prevalence of raised blood pressure and the prevalence of raised cholesterol levels in men ( $r = -0.55$ ;  $p < 0.001$ ).

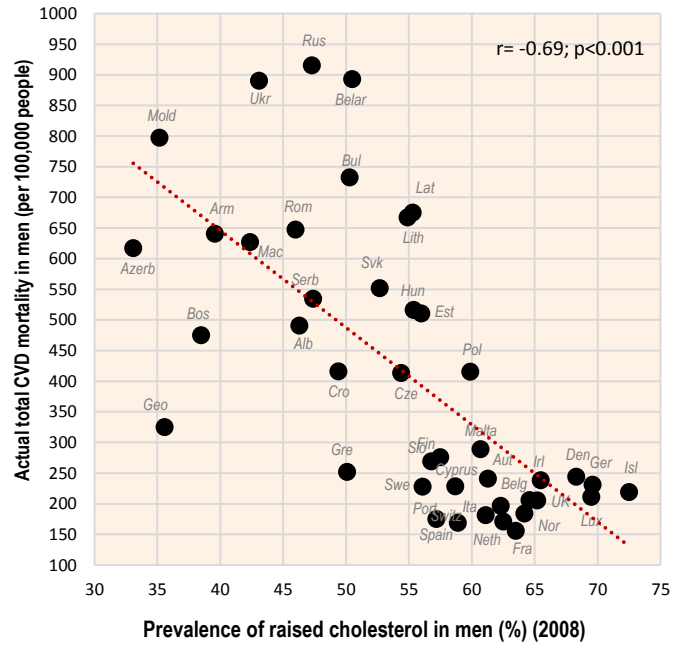

*Supplementary Fig. 2.* Correlation between the actual total CVD mortality and the prevalence of raised cholesterol levels in men ( $r = -0.69$ ;  $p < 0.001$ ).

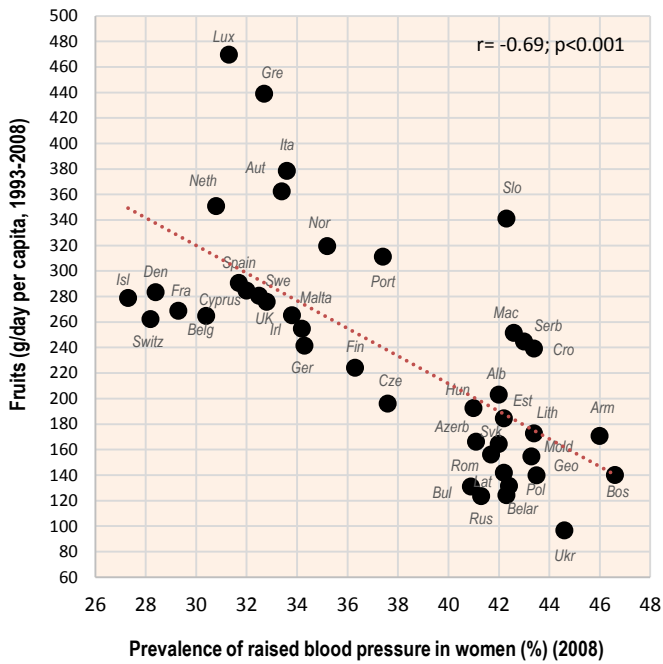

Supplementary Fig. 3. Correlation between the mean daily consumption of fruits and the prevalence of raised blood pressure in women ( $r = -0.69$ ;  $p < 0.001$ ).

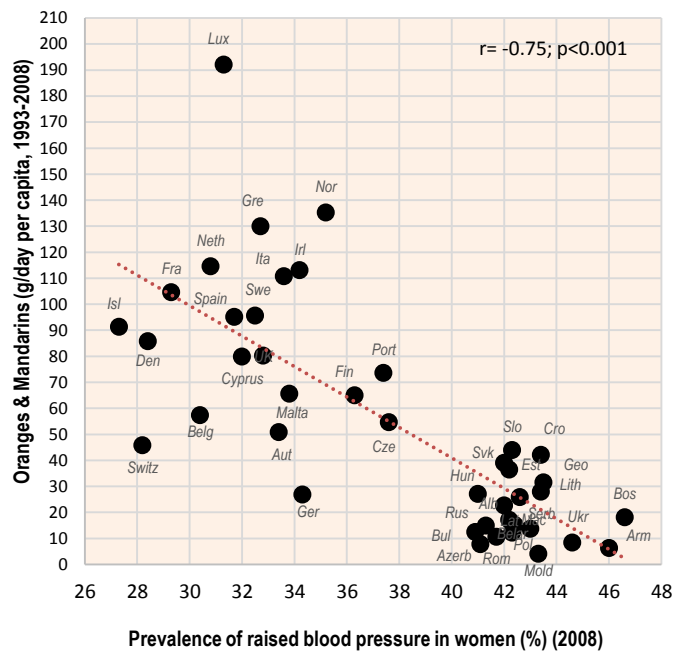

Supplementary Fig. 4. Correlation between the mean daily consumption of oranges & mandarins and the prevalence of raised blood pressure in women ( $r = -0.75$ ;  $p < 0.001$ ).

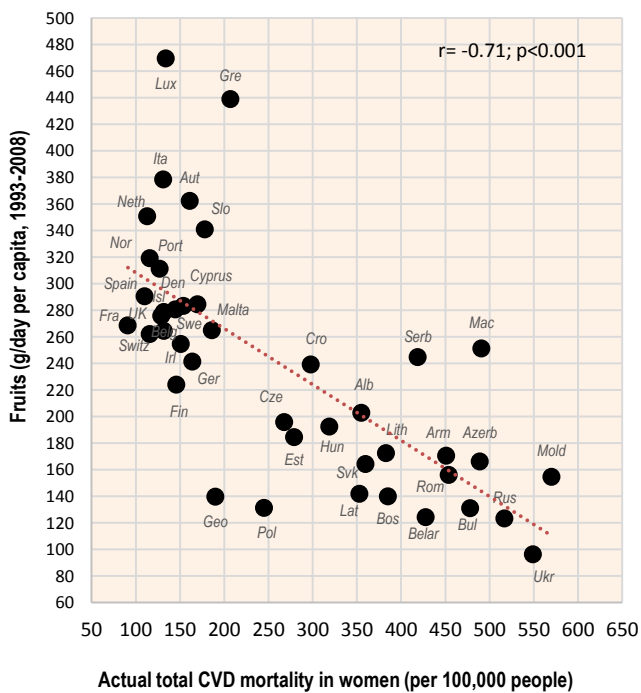

Supplementary Fig. 5. Correlation between the mean daily consumption of fruits and the actual total CVD mortality in women ( $r = -0.71$ ;  $p < 0.001$ ).

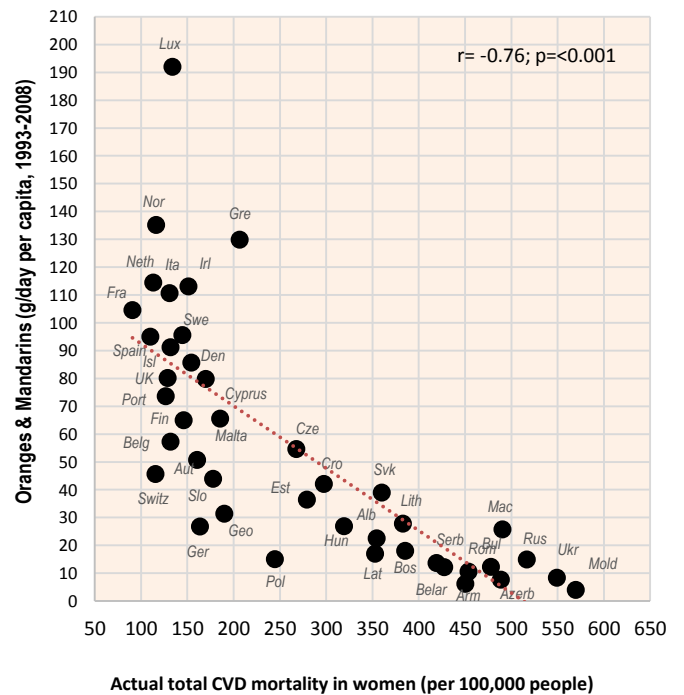

Supplementary Fig. 6. Correlation between the mean daily consumption of oranges & mandarins and the actual total CVD mortality in women ( $r = -0.76$ ;  $p = 0.001$ ).

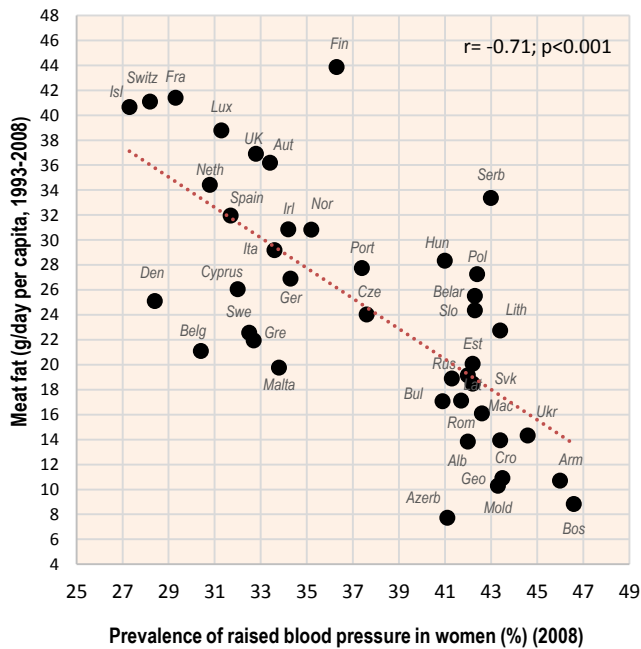

Supplementary Fig. 7. Correlation between the mean daily consumption of meat fat and the prevalence of raised blood pressure in women ( $r = -0.71$ ;  $p = 0.001$ ).

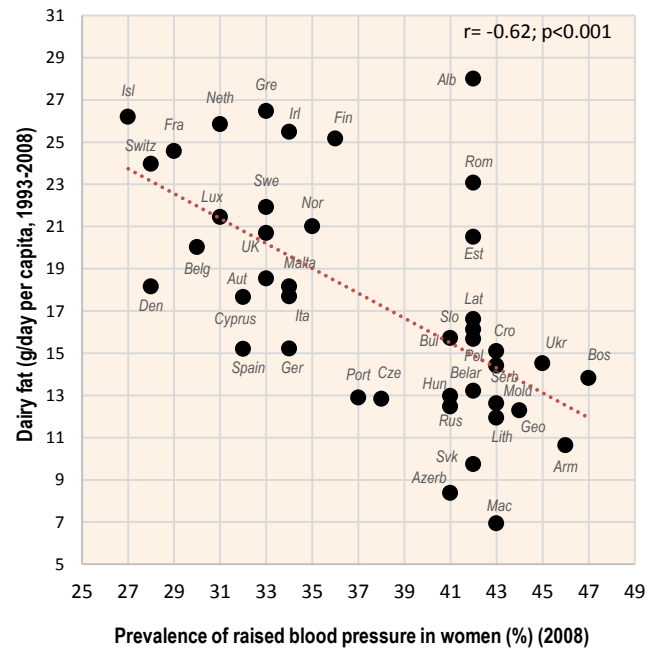

Supplementary Fig. 8. Correlation between the mean daily consumption of dairy fat and the prevalence of raised blood pressure in women ( $r = -0.62$ ;  $p = 0.001$ ).

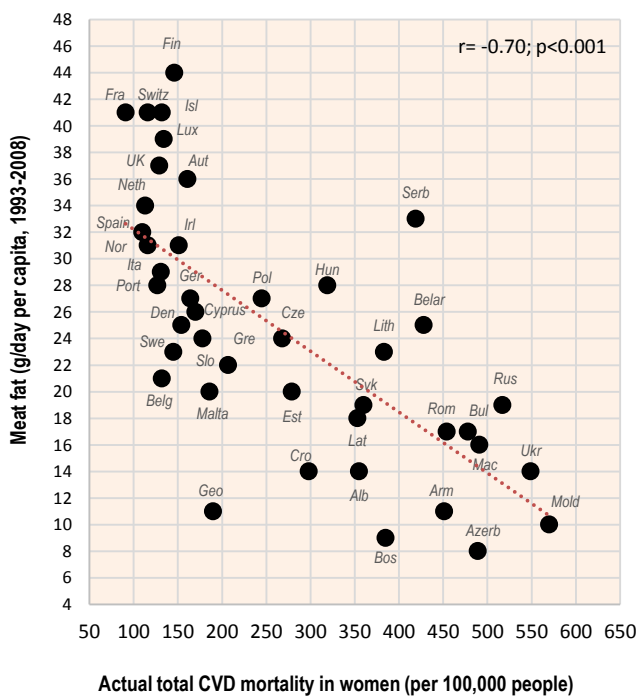

Supplementary Fig. 9. Correlation between the mean daily consumption of meat fat and the actual total CVD mortality in women ( $r = -0.70$ ;  $p < 0.001$ ).

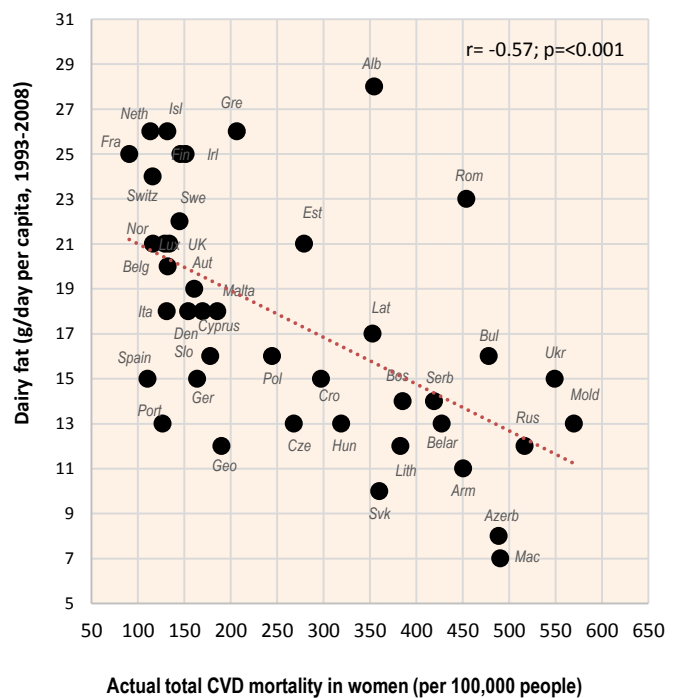

Supplementary Fig. 10. Correlation between the mean daily consumption of dairy fat and the actual total CVD mortality in women ( $r = -0.57$ ;  $p = 0.001$ ).

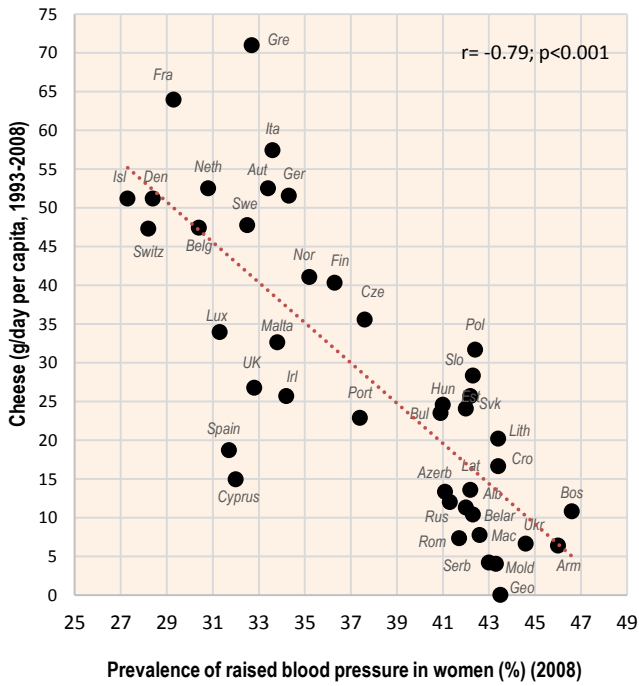

Supplementary Fig. 11. Correlation between the mean daily consumption of cheese and the prevalence of raised blood pressure in women ( $r = -0.79$ ;  $p = 0.001$ ).

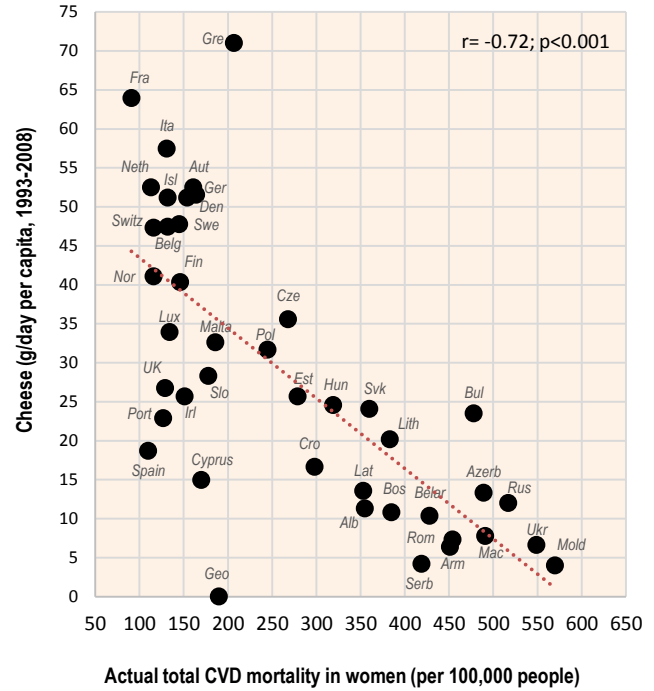

Supplementary Fig. 12. Correlation between the mean daily consumption of cheese and the actual total CVD mortality in women ( $r = -0.72$ ;  $p < 0.001$ ).

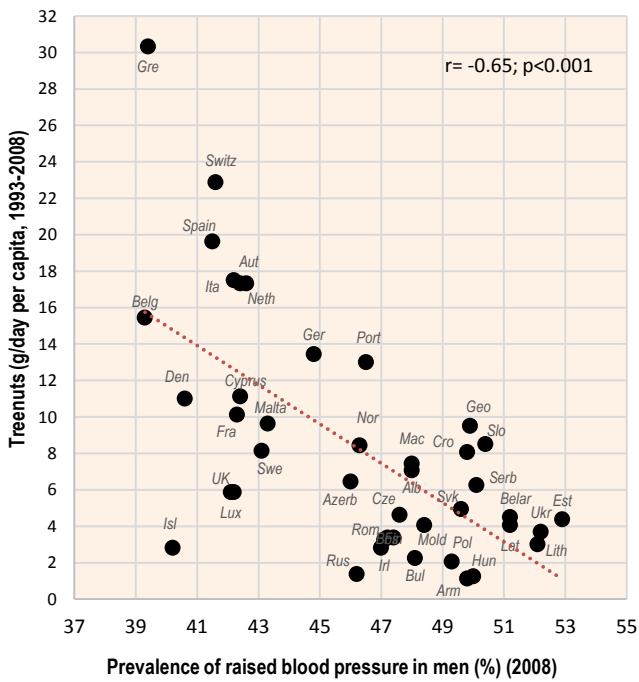

Supplementary Fig. 13. Correlation between the mean daily consumption of tree nuts and the prevalence of raised blood pressure in men ( $r = -0.65$ ;  $p < 0.001$ ).

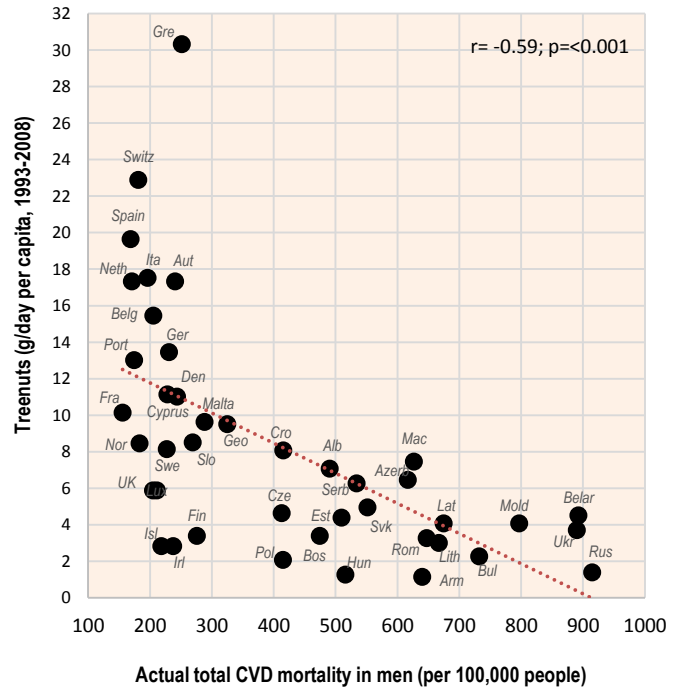

Supplementary Fig. 14. Correlation between the mean daily consumption of tree nuts and the actual total CVD mortality in men ( $r = -0.59$ ;  $p = 0.001$ ).



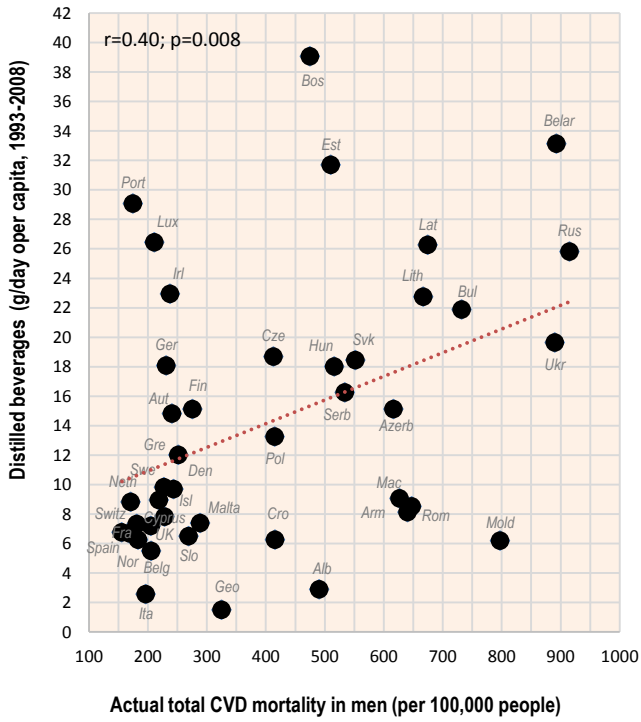

Supplementary Fig. 15. Correlation between the mean daily consumption of distilled beverages (1993-2008) and the actual total CVD mortality in men ( $r=0.40; p=0.008$ ).

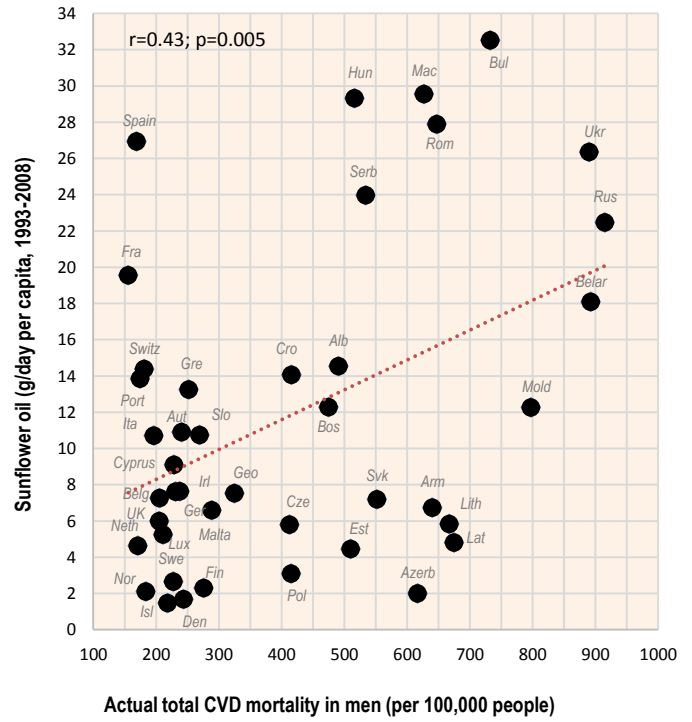

Supplementary Fig. 16. Correlation between the mean daily consumption of sunflower oil (1993-2008) and the actual total CVD mortality in men ( $r=0.43; p=0.005$ ).

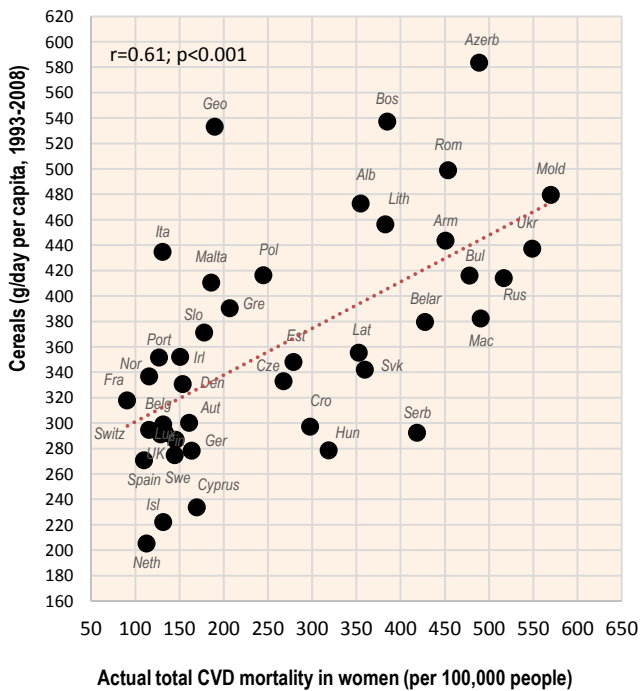

Supplementary Fig. 17. Correlation between the mean daily consumption of cereals (1993-2008) and the actual total CVD mortality in women ( $r=0.61; p<0.001$ ).

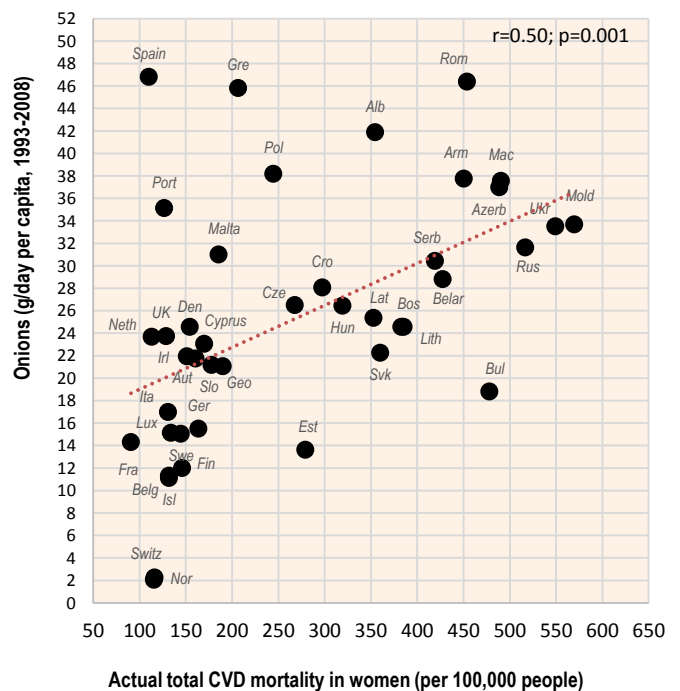

Supplementary Fig. 18. Correlation between the mean daily consumption of onions (1993-2008) and the actual total CVD mortality in women ( $r=0.50; p=0.001$ ).

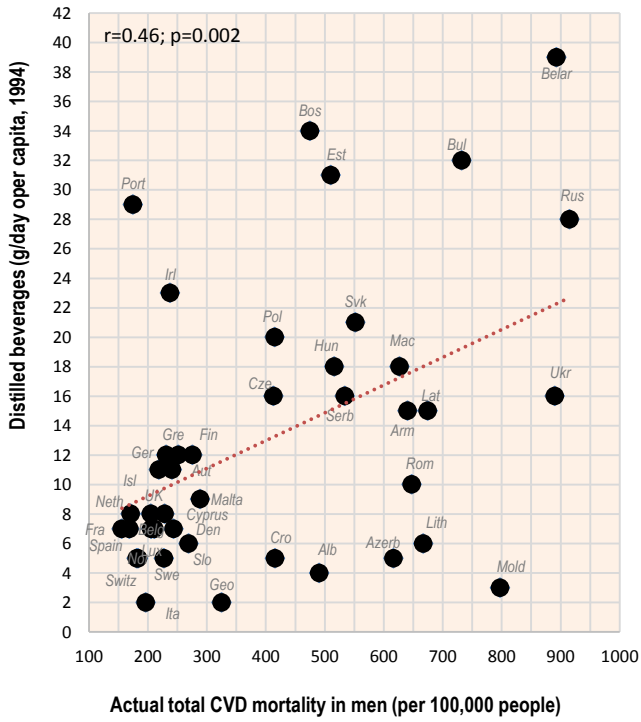

Supplementary Fig. 19. Correlation between the mean daily consumption of distilled beverages (1994) and the actual total CVD mortality in men ( $r=0.46$ ;  $p=0.002$ ).

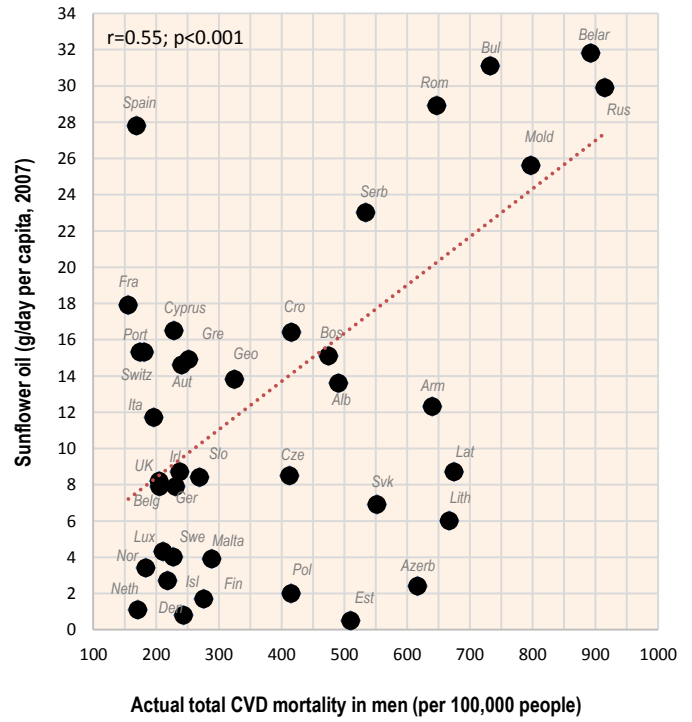

Supplementary Fig. 20. Correlation between the mean daily consumption of sunflower oil (2007) and the actual total CVD mortality in men ( $r=0.55$ ;  $p<0.001$ ).

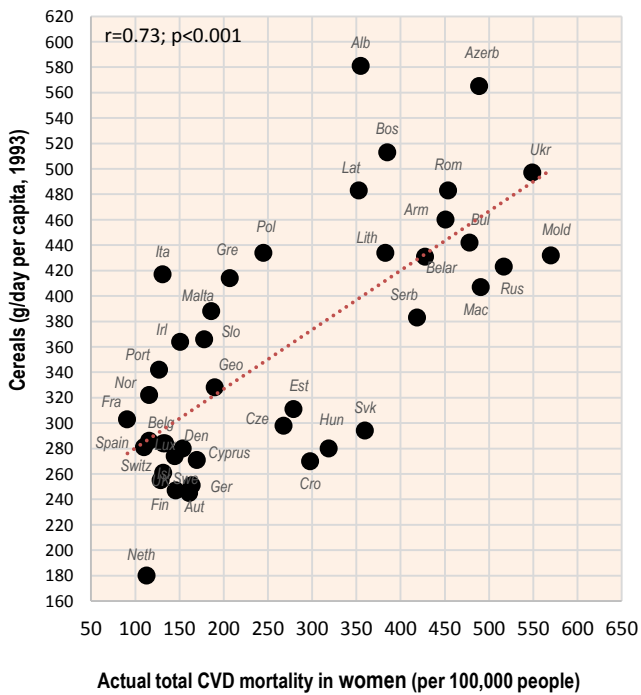

Supplementary Fig. 21. Correlation between the mean daily consumption of cereals (1993) and the actual total CVD mortality in women ( $r=0.73$ ;  $p<0.001$ ).

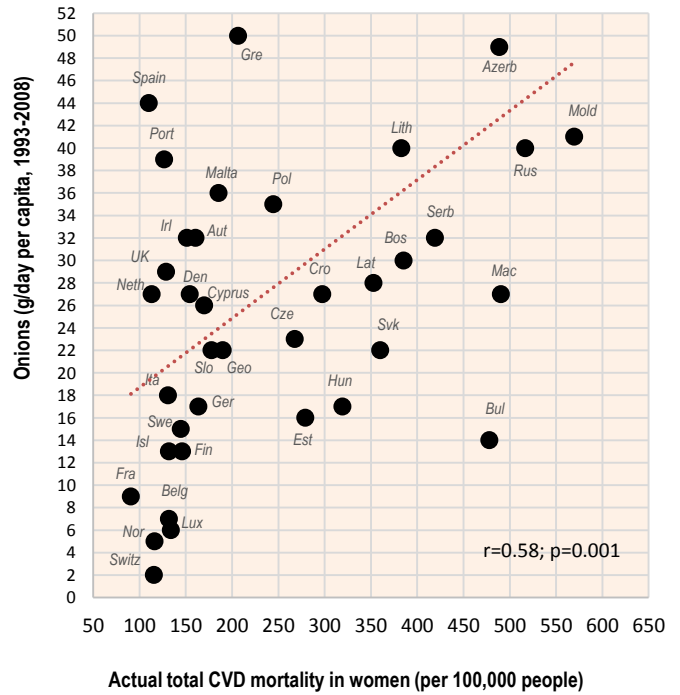

Supplementary Fig. 22. Correlation between the mean daily consumption of onions (2008) and the actual total CVD mortality in women ( $r=0.58$ ;  $p=0.001$ ).

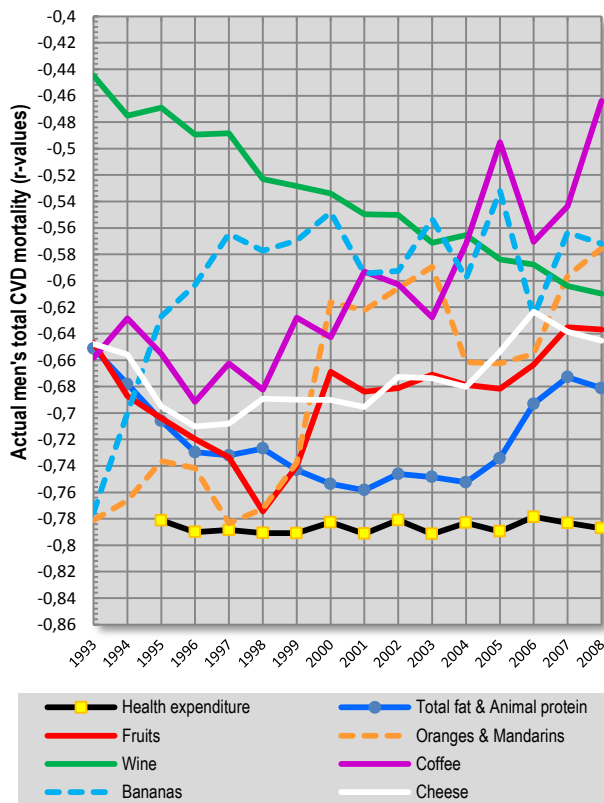

Supplementary Fig. 23. Temporal changes in the relationship among 7 negative correlates of total CVD mortality (men).

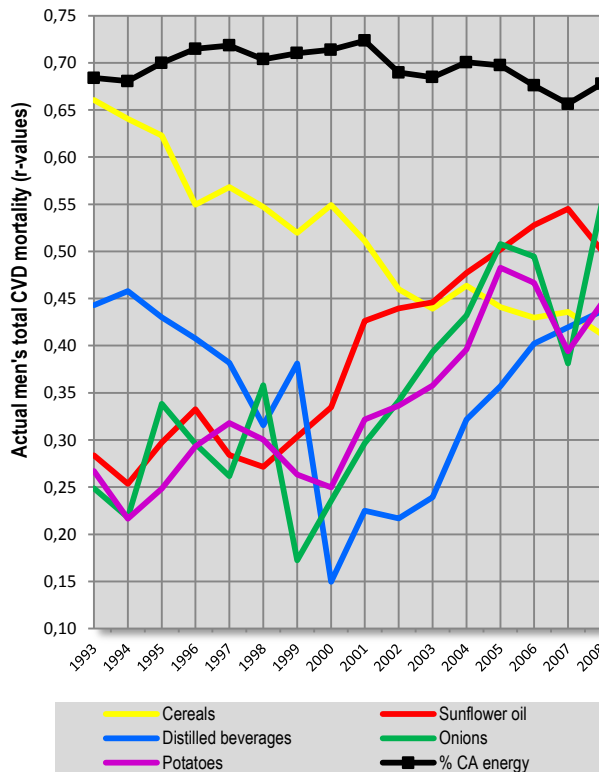

Supplementary Fig. 24. Temporal changes in the relationship among 6 positive correlates of total CVD mortality (men).

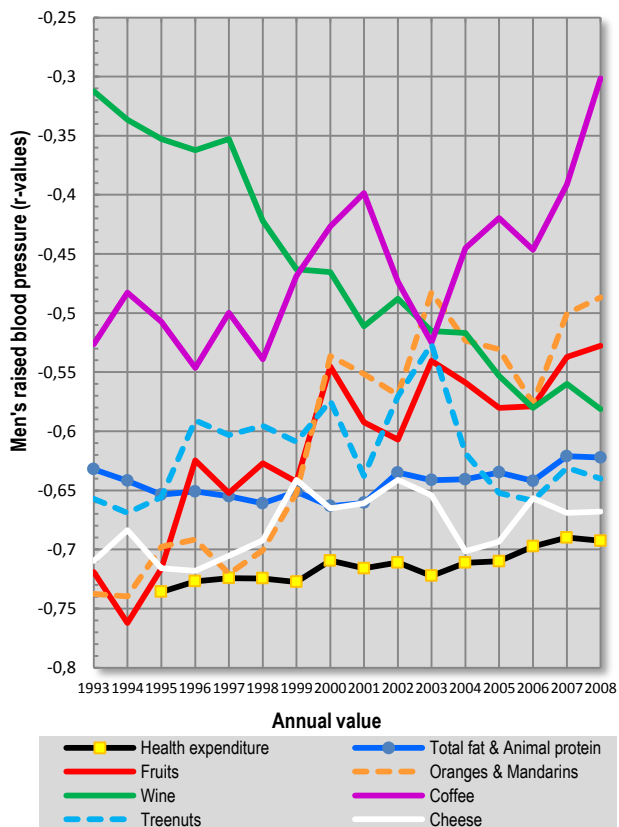

Supplementary Fig. 25. Temporal changes in the correlation among 8 negative correlates of raised blood pressure (men).

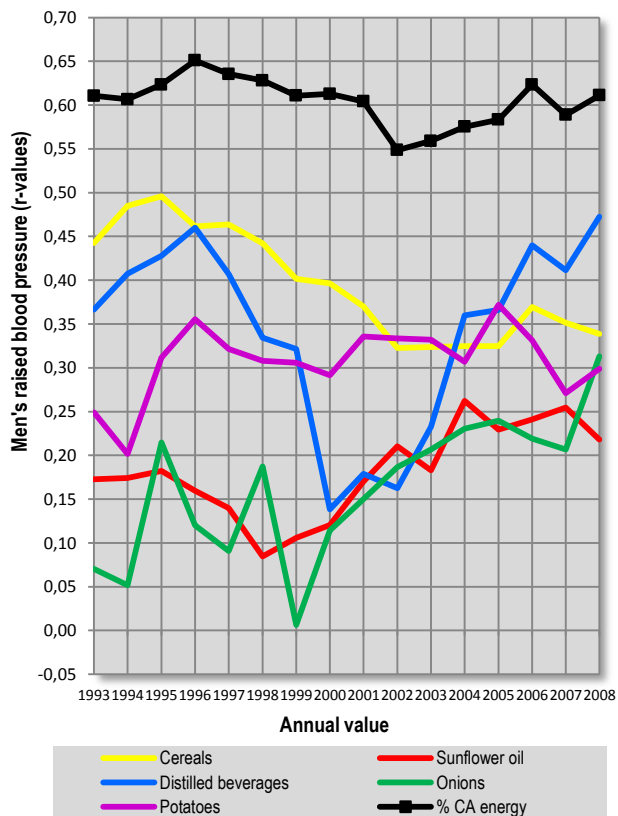

Supplementary Fig. 26. Temporal changes in the correlation among 6 positive correlates of raised blood pressure (men, 42 countries, excluding Turkey).

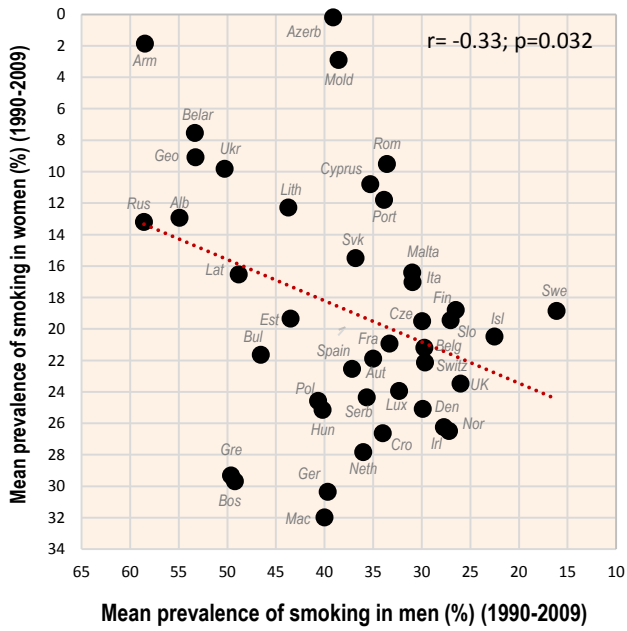

Supplementary Fig. 27. Correlation between the mean prevalence of smoking in men and women ( $r = -0.33$ ;  $p = 0.032$ ).

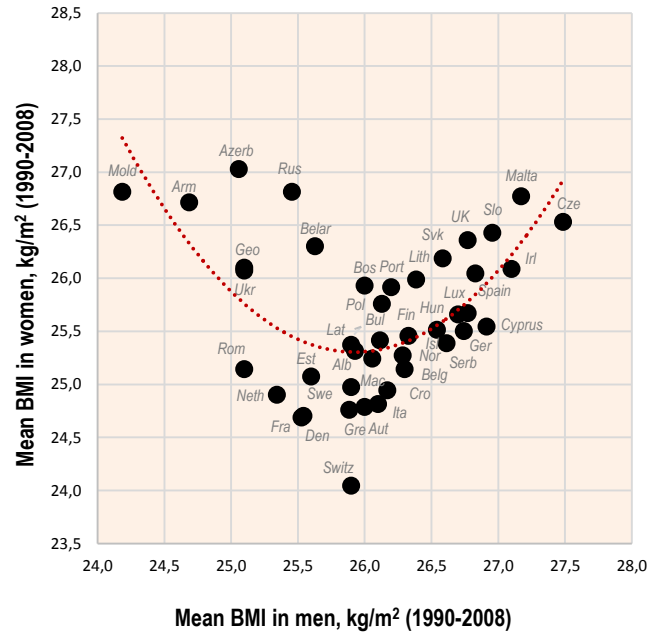

Supplementary Fig. 28. Relationship between the mean BMI in men and women.

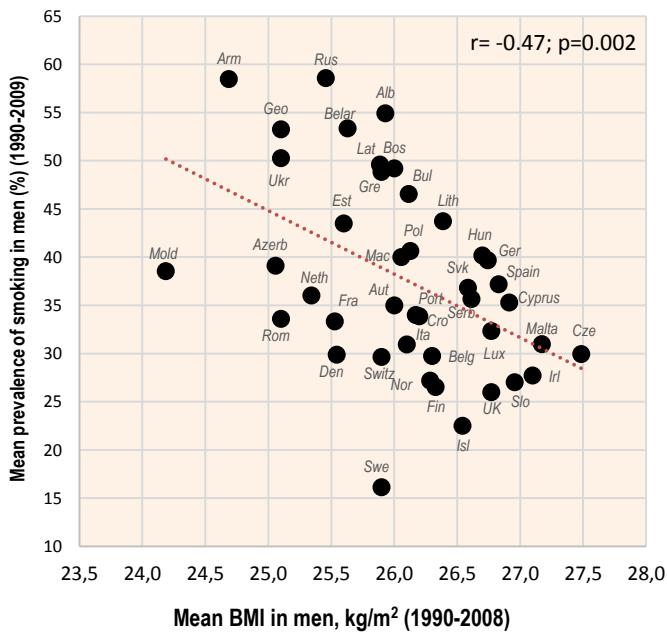

Supplementary Fig. 29. Correlation between the mean prevalence of smoking and the mean BMI in men ( $r = -0.47$ ;  $p = 0.002$ ).

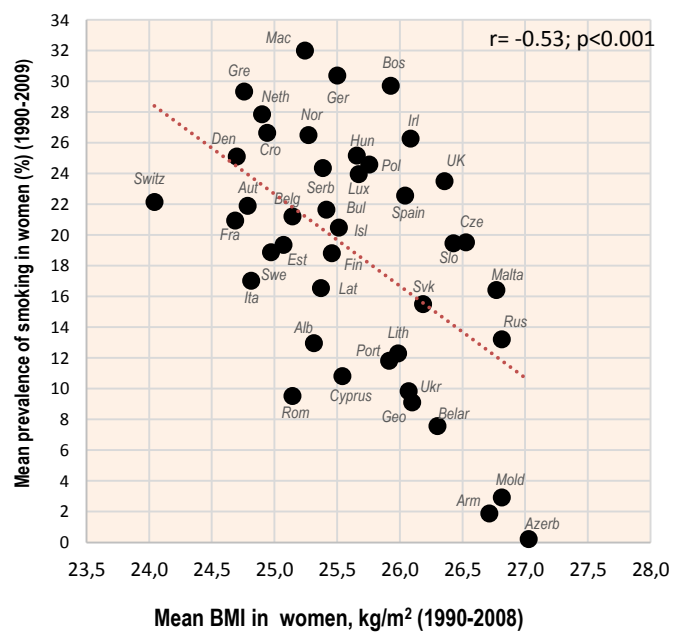

Supplementary Fig. 30. Correlation between the mean prevalence of smoking and the mean BMI in women ( $r = -0.53$ ;  $p < 0.001$ ).

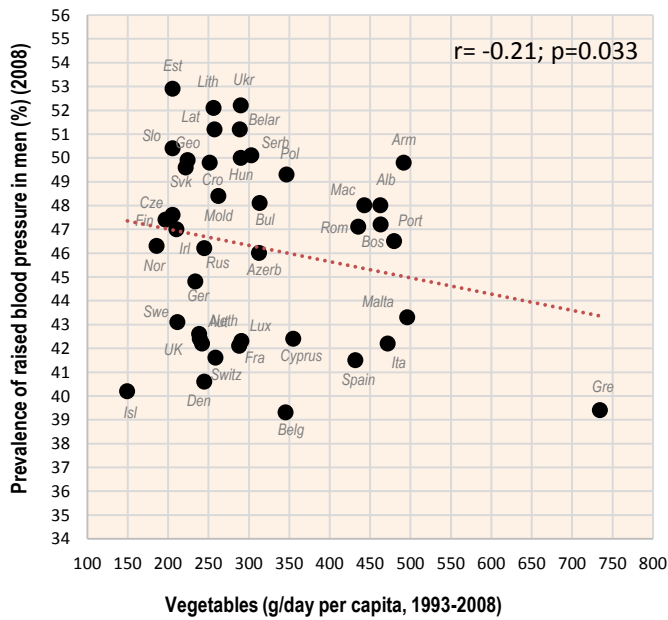

Supplementary Fig. 31. Correlation between the mean consumption of vegetables and the prevalence of raised blood pressure in men ( $r = -0.21$ ;  $p = 0.033$ ).

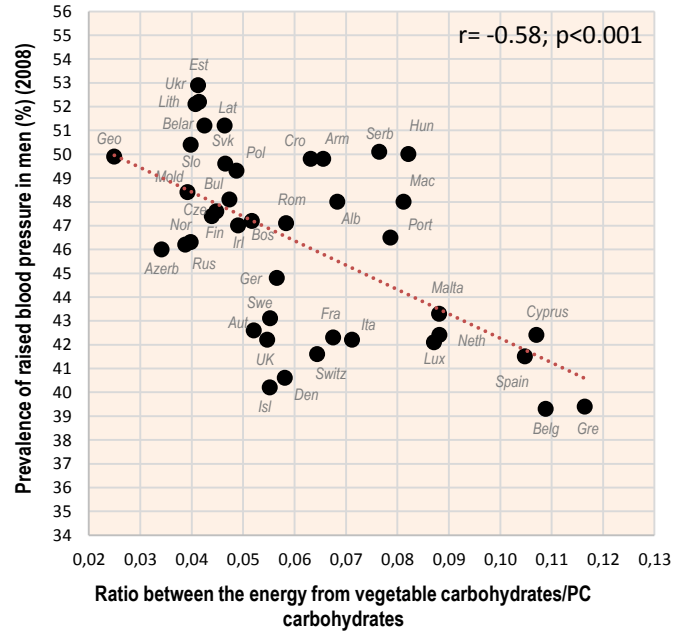

Supplementary Fig. 32. Correlation between the mean vegetable carbohydrates/PC CARB energy ratio and the prevalence of raised blood pressure in men ( $r = -0.58$ ;  $p < 0.001$ ).

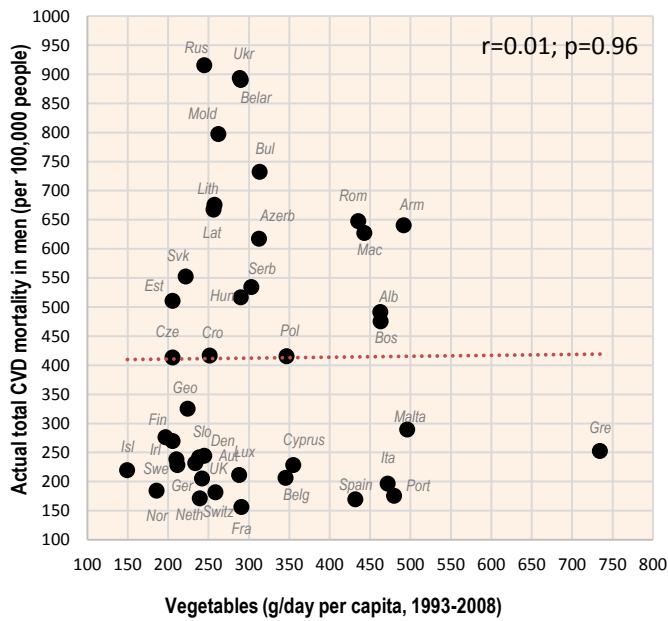

Supplementary Fig. 33. Correlation between the mean consumption of vegetables and the actual total CVD mortality in men ( $r = 0.01$ ;  $p = 0.96$ ).

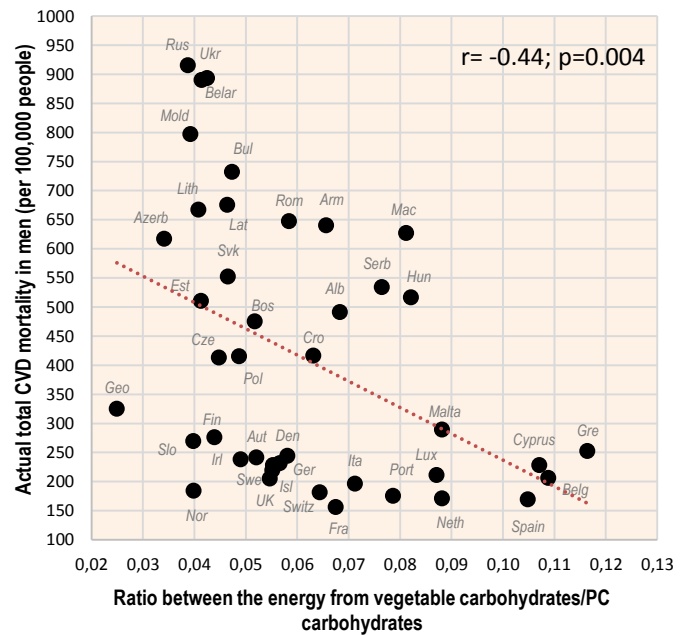

Supplementary Fig. 34. Correlation between the mean vegetable carbohydrates/PC CARB energy ratio and the actual total CVD mortality in men ( $r = -0.44$ ;  $p = 0.004$ ).

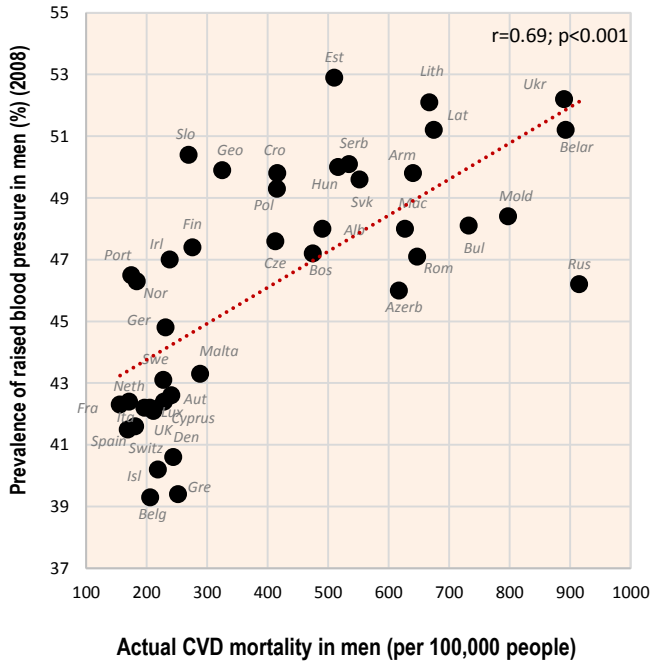

Supplementary Fig. 35. Correlation between the prevalence of raised blood pressure and the actual total CVD mortality in men ( $r=0.69; p<0.001$ ).

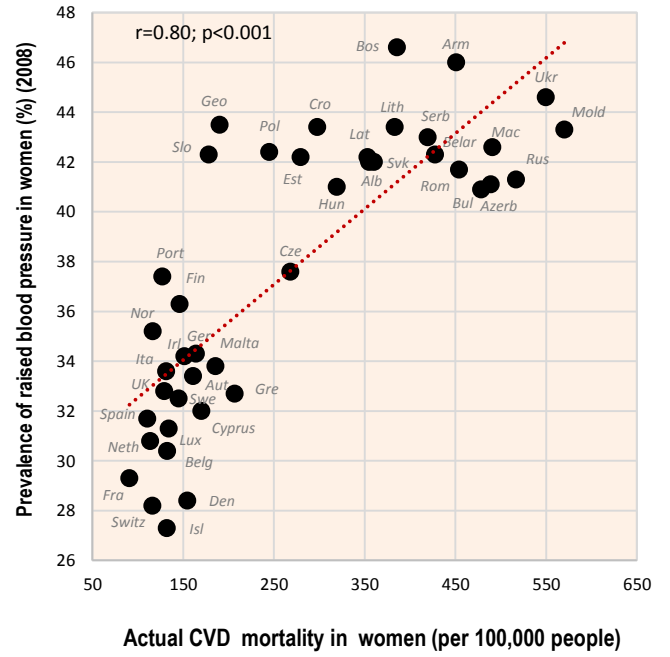

Supplementary Fig. 36. Correlation between the prevalence of raised blood pressure and the actual total CVD mortality in women ( $r=0.80; p<0.001$ ).

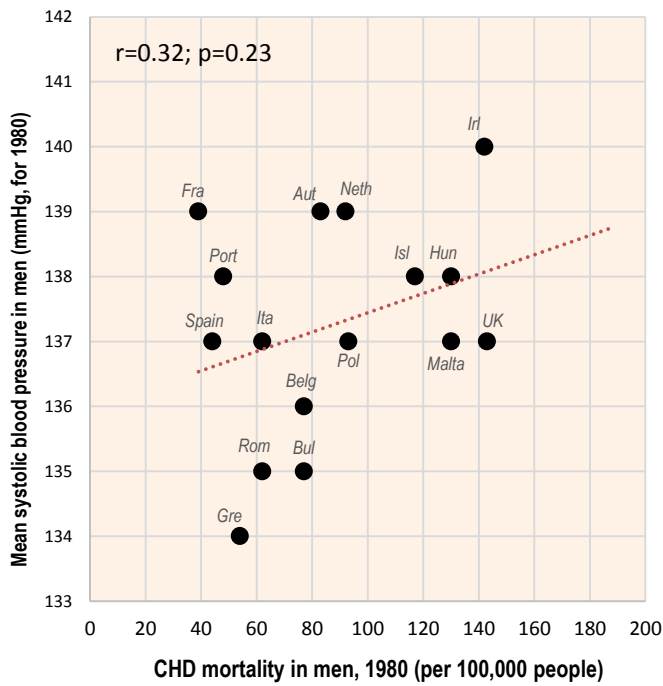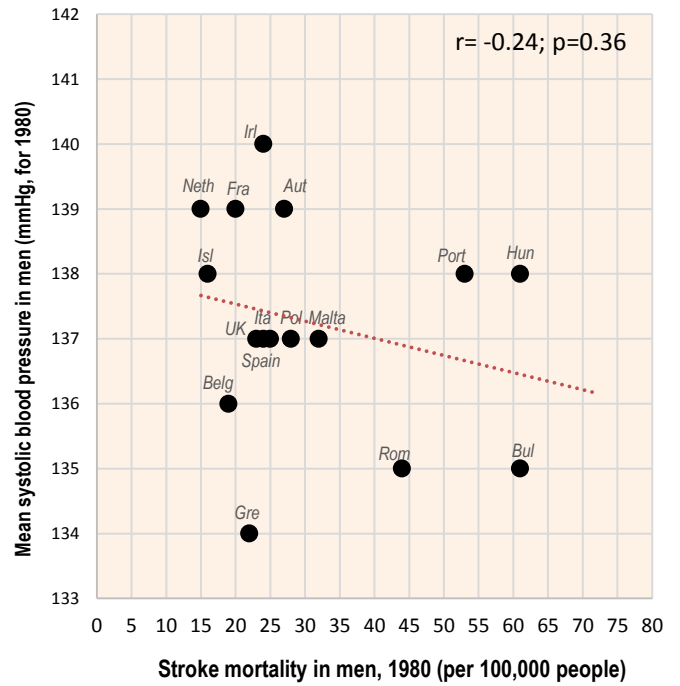

**Supplementary Fig. 37.** Historical correlation between the mean systolic blood pressure (for 1980) and CHD mortality in men, for 1980 ( $r=0.32$ ;  $p=0.23$ ).

**Supplementary Fig. 38.** Historical correlation between the mean systolic blood pressure (for 1980) and stroke mortality in men, for 2000 ( $r=-0.24$ ;  $p=0.36$ ).

*Note:* This comparison uses only the sample of 16 countries, for which all data in 1980 are available. The correlation in the total sample of 27 available countries is  $r=0.26$  ( $p=0.18$ ).

*Note:* This comparison uses only the sample of 16 countries, for which all data in 1980 are available. The correlation in the total sample of 27 available countries is  $r=-0.06$  ( $p=0.76$ ).

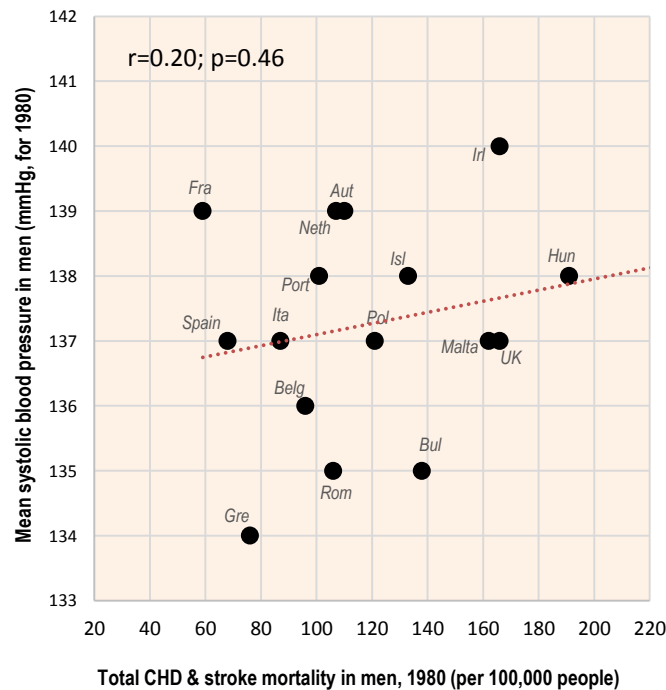

**Supplementary Fig. 39.** Historical correlation between the mean systolic blood pressure (for 1980) and total CHD & stroke mortality in men, for 1980 ( $r=0.20$ ;  $p=0.46$ ).

*Note:* This comparison uses only the sample of 16 countries, for which all data in 1980 are available. The correlation in the total sample of 27 available countries is  $r=0.18$  ( $p=0.37$ ).

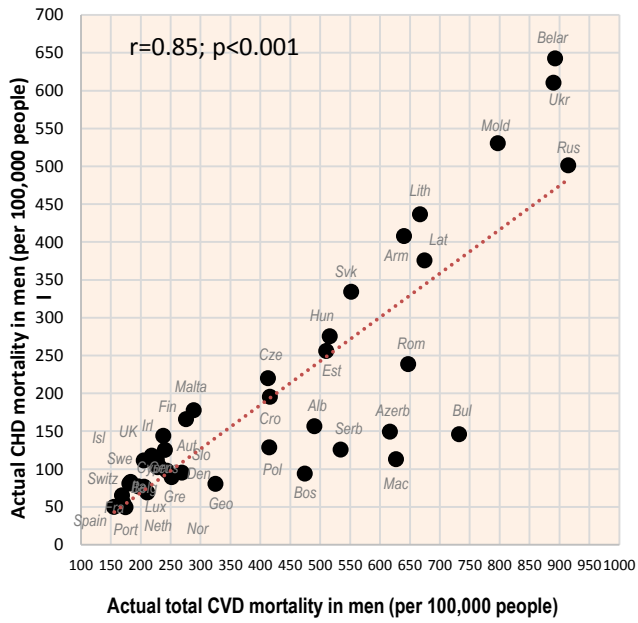

Supplementary Fig. 40. Correlation between the actual CHD mortality and the actual total CVD mortality in men ( $r=0.85$ ;  $p<0.001$ ).

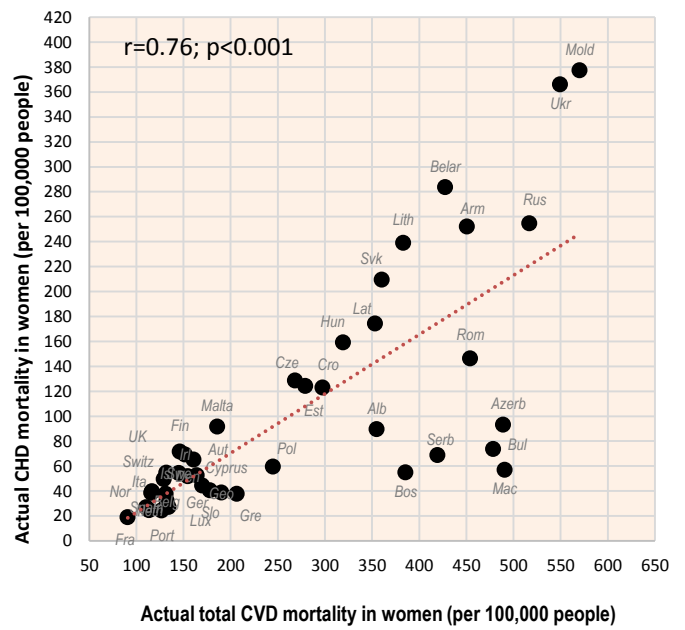

Supplementary Fig. 41. Correlation between the actual CHD mortality and the actual total CVD mortality in women ( $r=0.76$ ;  $p<0.001$ ).



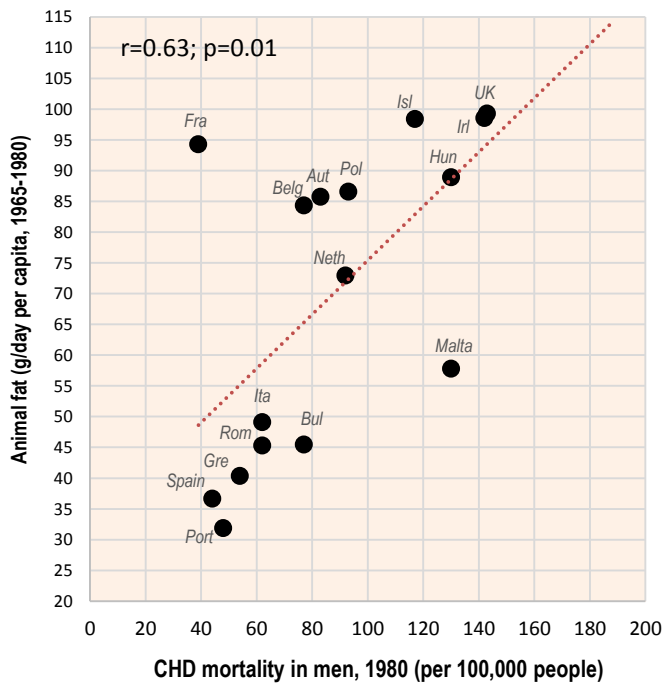

Supplementary Fig. 42. Historical correlation between the mean consumption of animal fat (1965-1980) and CHD mortality in men, for 1980 ( $r=0.63$ ;  $p=0.01$ ).

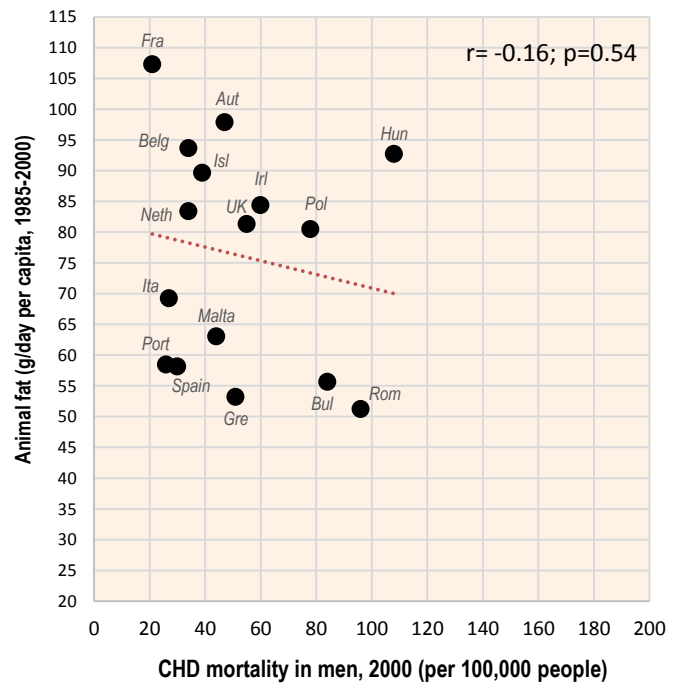

Supplementary Fig. 43. Historical correlation between the mean consumption of animal fat (1985-2000) and CHD mortality in men, for 2000 ( $r=-0.16$ ;  $p=0.54$ ).

Note: This comparison uses only the sample of 16 countries, for which all data in 1980 are available.

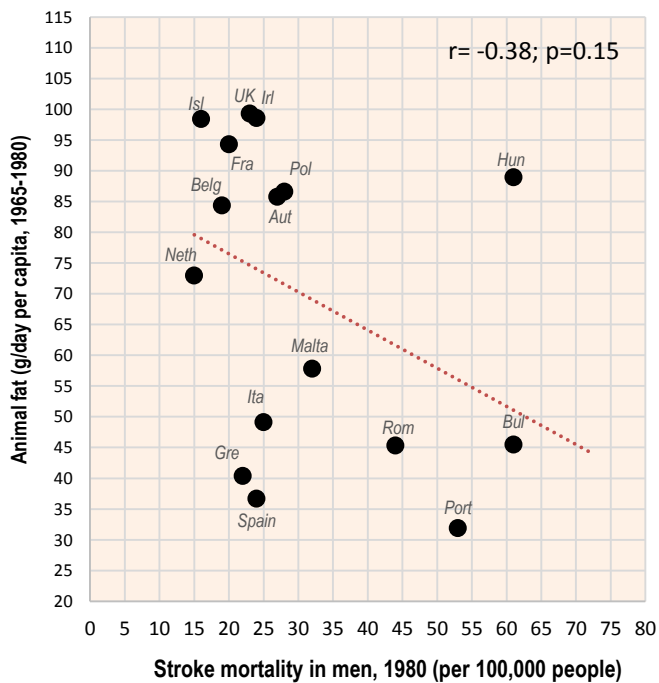

Supplementary Fig. 44. Historical correlation between the mean consumption of animal fat (1965-1980) and stroke mortality in men, for 1980 ( $r=-0.38$ ;  $p=0.15$ ).

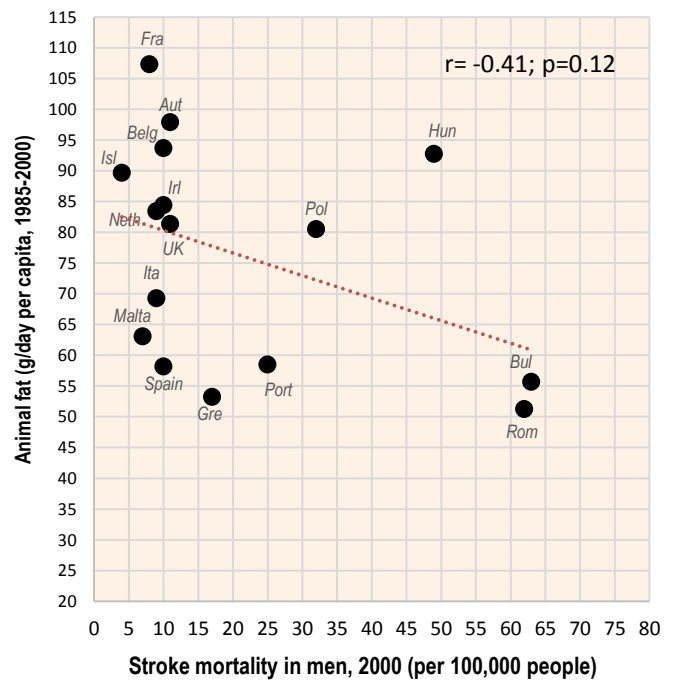

Supplementary Fig. 45. Historical correlation between the mean consumption of animal fat (1985-2000) and stroke mortality in men, for 2000 ( $r=-0.41$ ;  $p=0.12$ ).

Note: This comparison uses only the sample of 16 countries, for which all data in 1980 are available.

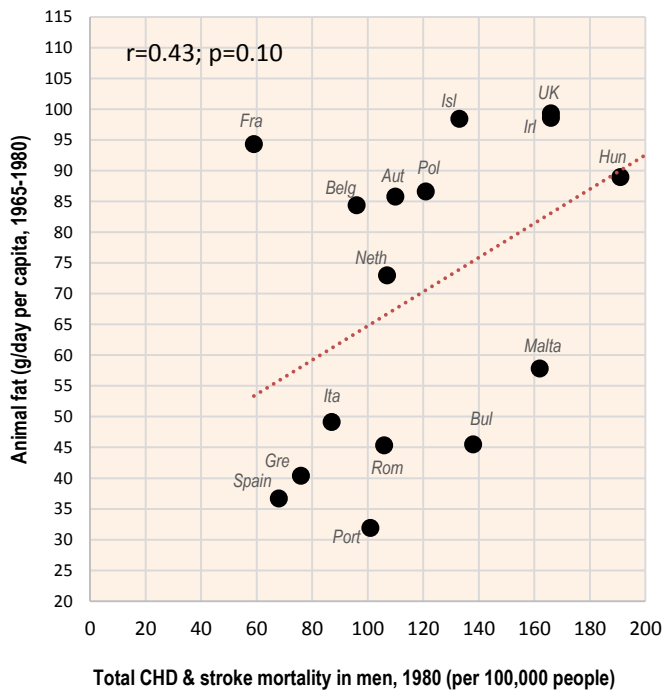

Supplementary Fig. 46. Historical correlation between the mean consumption of animal fat (1965-1980) and total CHD & stroke mortality in men, for 1980 ( $r=0.43$ ;  $p=0.10$ ).

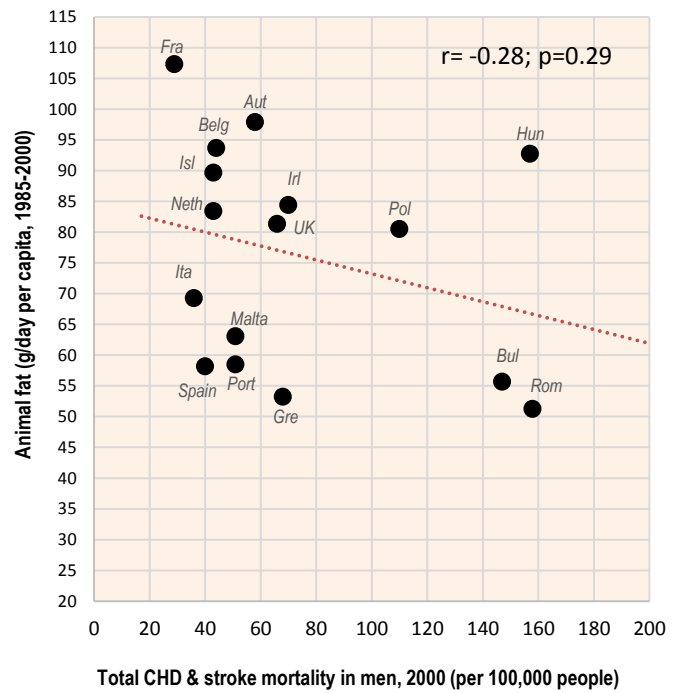

Supplementary Fig. 47. Historical correlation between the mean consumption of animal fat (1985-2000) and total CHD & stroke mortality in men, for 2000 ( $r= -0.28$ ;  $p=0.29$ ).

Note: This comparison uses only the sample of 16 countries, for which all data in 1980 are available.
